# Supplementary material for: Design, synthesis and biological evaluation of oxalamide derivatives as potent neuraminidase inhibitors
Source: Royal Society of Chemistry journal article supplement (doi:10.1039/d2nj00726f), 2022-01-01
Supplement: d2nj00726f1.pdf [file d2nj00726f1.pdf]

1

## *Supporting Information*

2 **Design, synthesis and biological evaluation of oxalamide derivatives**

3 **as potent neuraminidase inhibitors**

4 Xing Yong Zhang, Li Ping Cheng\*, Zhi Jian Zhong, Wan Pang\*, Xue Song

5

6

### 7 **Contents**

8 **1. Database preparation**

9 **2. Molecular docking and MD simulations**

10 **3. Chemistry materials and methods**

11 **4. <sup>1</sup>H NMR, <sup>13</sup>C NMR and HRMS spectra for the target compounds Z1-Z10**

12 **5. Biological assays**

13

14

15

16

17

18

19

20

21

22

23

24

25

26

27

28

29

30

31

32

33

34

35

## 1 **1. Database preparation**

2 In the primary docking-based virtual screening, the compounds were obtained from  
3 the ZINC 12 database (<http://www.zinc12.docking.org/>). These small compounds  
4 were downloaded in “sdf format” and then converted to “sln format” by the software  
5 SYBYL-X 2.1 (Tripos, Inc., USA).

## 6 **2. Molecular docking and MD simulations**

7 Molecular docking technique is an important method to study the interaction  
8 mechanism between small molecules and proteins macromolecules.<sup>1,2</sup> The Surflex-  
9 Dock module was used for molecular docking in SYBYL-X 2.1 (Tripos, Inc., USA).  
10 Docking score was used to examine the affinity between the ligand and the receptor.  
11 The higher the total-score value is, the better the docking result is. The crystal  
12 structure of the neuraminidase protein complex (PDB ID: 2HU0)<sup>3</sup> was taken from the  
13 RSCB protein database (<http://www.rcsb.org/pdb/>). The X-ray coordinates of  
14 neuraminidase (PDB ID: 2HU0) had been listed in the Table S2. The protein crystal  
15 was used as a template to the primary docking-based virtual screening. Before the  
16 docking calculations were performed, a series of necessary preparations of protein  
17 need to be treated such as removing water molecules and non-ligand structures in  
18 protein crystals, protonating amino acid residues such as Asp and Glu in active site.  
19 The AMBER-FF99<sup>4</sup> atomic type and Gasteiger-Huckel charge were added to the  
20 ligand. The complex protein was optimized by AMBER7 FF99 force field and  
21 molecular docking was performed according to the generated protomol file to obtain  
22 the corresponding docking score. All of the above protein preparation processes are  
23 achieved through the SYBYL-X 2.1 biopolymer module. The docked pose selection  
24 should satisfy the following criteria: 1) a correct pose is usually regarded as matching  
25 the pose in a cocrystallized protein or enzyme; 2) The higher the total-score value is,  
26 the better the docked pose is. 3) The docked pose could interact well with some key  
27 amino acids at the active site of NA, such as Arg118, Arg292, Arg371, which are  
28 essential for the NA inhibitory activity.

29 In this work, the 4-chloro and 3-fluorine substituted phenyl group had been given  
30 priority from the beginning. However, as shown in Fig. S1, the molecular docking  
31 results shows that 4-chloro substituted phenyl in **Z11** could not well occupy the 430-  
32 cavity but stretches out of the 430-cavity. The 3-fluorine substituted phenyl in **Z12**  
33 and 3-methoxy substituted phenyl in **Z13** could not fully extend into the 430-cavity.  
34 Table S1 shows that the total scores of these three compounds are all far lower than

1 other synthesized target compounds and lead compound **5**. Therefore, the activities  
2 against NA of the three compounds **Z11-Z13** are theoretically poor, they were  
3 excluded from the synthesized target compounds and had not been performed further  
4 study. The reason why the 3-chloro, 2-methoxy instead of 4-fluorine substituted  
5 phenyl of the lead compound **5** should also be attributed to the molecular docking  
6 study. After the most potent **Z2** was synthesized, the introduction of 4-fluorine  
7 substituted phenyl had been tried and the corresponding compound **Z14** had been  
8 designed. However, as shown in Fig. S1, the 4-fluorine substituted phenyl of **Z14** also  
9 stretches out of the 430-cavity, the docking score is as low as 7.05, indicating its poor  
10 activity. Therefore, **Z14** was also excluded from the synthesized target compounds  
11 and had not been performed further study.

12

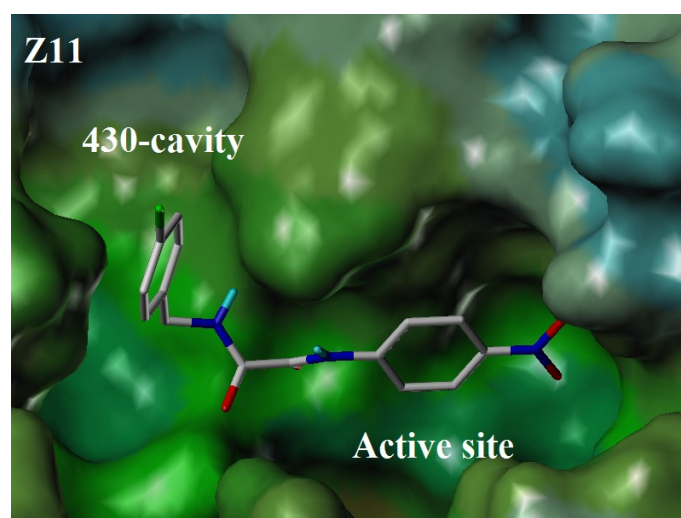

13

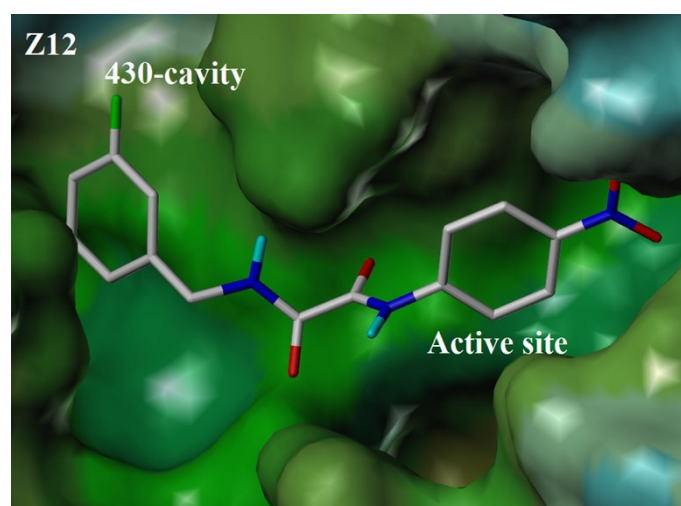

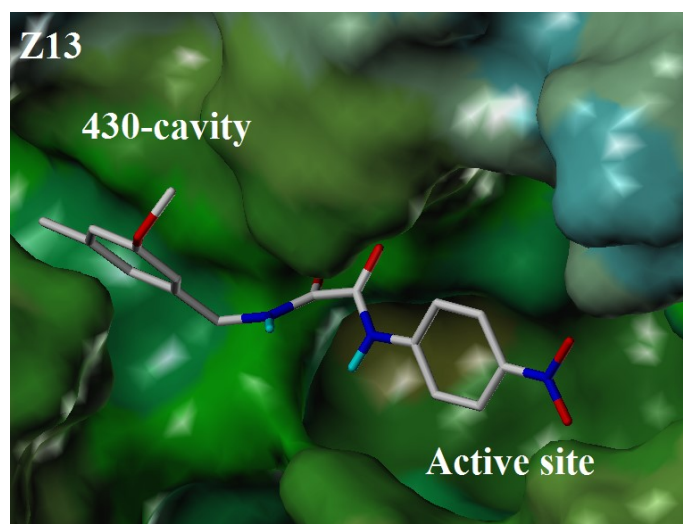

1

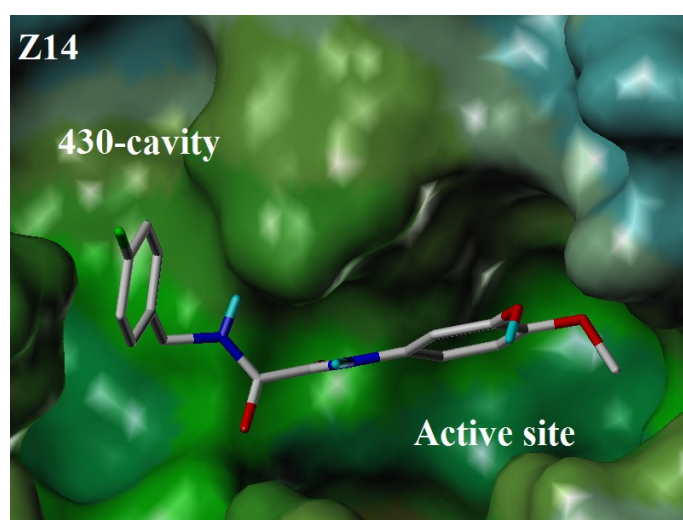

2

3 **Fig. S1** Molecular docking results of designed compounds **Z11-Z14** with NA (show  
4 only polar hydrogens)

5 **Table S1.** The docking scores of some designed compounds with NA

| Compound  | Structure | Total score |
|-----------|-----------|-------------|
| <b>5</b>  |           | 9.9735      |
| <b>Z2</b> |           | 11.4908     |

---

|     |                                                                                     |         |
|-----|-------------------------------------------------------------------------------------|---------|
| Z5  | 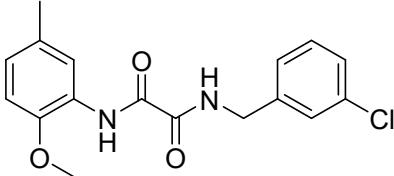   | 10.5130 |
| Z10 |    | 10.1822 |
| Z11 |    | 5.6073  |
| Z12 |    | 6.0449  |
| Z13 |  | 5.3957  |
| Z14 |  | 7.0530  |

---

1 In order to verify the reliability of molecular docking, the molecular dynamics  
2 simulations (MD) of the compound molecules and neuraminidase protein were  
3 performed under the Linux system with Amber 12.0 software packages.<sup>5</sup> The ff99SB<sup>6</sup>  
4 force field and the AMBER force field (gaff)<sup>7</sup> were added to the protein and ligand  
5 compounds respectively. The counter-ions, Na<sup>+</sup> or Cl<sup>-</sup>, were added to neutralize the  
6 unbalanced charges in the complexes.<sup>8</sup> The particle mesh Ewald (PME) algorithm<sup>9</sup> of  
7 the electrostatic term was defined as a dielectric constant of 1.0 and a cutoff 10.0 Å.  
8 In order to reduce the computational demand, each system was added 10 Å out of the  
9 solute with an octahedral TIP3P water box. In the initial optimization step is  
10 performed by the Sander package in amber, the atomic positions of all solutes are  
11 bound by 100 kal·mol<sup>-1</sup>·Å<sup>-2</sup>. The whole system is minimized without binding force,  
12 which is reduced by 1000 steps of steepest descent method and then by 4000 steps of

1 conjugated gradient method. Then, the system is gradually heated from 0 to 300 K  
 2 over a period of 20 ps in the NVT ensemble, and balanced in NPT system at 300 K  
 3 over 100 ps. Finally, a dynamic simulation process of 20 ns was carried out under the  
 4 condition of 300 K with 1.0 atm and the NMR condition is closed. During the whole  
 5 MD operation, the coordinate displacement is recorded per 2 ps. VMD is used for  
 6 visualization and analysis. The selected compounds were subjected to RMSD and  
 7 cluster analysis using the Xmgrace program. The binding free energy of the ligand-  
 8 neuraminidase protein complex was calculated by Molecular Mechanics/Generalized  
 9 Born Surface Area (MM/GBSA) and Molecular Mechanics/Poisson Boltzman Surface  
 10 Area (MM/PBSA).<sup>10-12</sup> The stable conformation generated by the last 2 ns was used to  
 11 calculate the binding free energy ( $\Delta G_{bind}$ ), which was calculated as follows:

$$\Delta G_{bind} = \Delta H - T\Delta S \approx \Delta G_{gas} + \Delta G_{sol} - T\Delta S;$$

$$\Delta G_{gas} = \Delta E_{ele} + \Delta E_{vdw}; \Delta G_{sol} = \Delta G_{PB/GB} + \Delta G_{SA}$$

13  $\Delta G_{gas}$  represents the gas phase interaction energy between protein and ligand,  
 14 including electrostatic energy ( $\Delta E_{ele}$ ) and van der Waals energy ( $\Delta E_{vdw}$ ).  $\Delta G_{sol}$  is the  
 15 sum of  $\Delta G_{PB/GB}$  electrostatic solvation energy (polarity contribution) and non-  
 16 electrostatic solvation component (non-polar contribution)  $\Delta G_{SA}$ . In this work, the  
 17 calculation of entropy change is not considered, because its calculation process is very  
 18 time-consuming and the calculation accuracy is low. Table S3 shows the binding free  
 19 energies obtained by the two calculated methods for the three compounds in the **Data**  
 20 **set 4** and the reference OSC. The corresponding RMSD values were shown in Fig. S2.

21 **Table S2.** Crystallographic data and refinement statistics

|                                                          |                                                                |
|----------------------------------------------------------|----------------------------------------------------------------|
| PDB ID                                                   | 2HU0                                                           |
| Space group                                              | C 2 2 21                                                       |
| Cell constants<br>a, b, c, $\alpha$ , $\beta$ , $\gamma$ | 198.08 Å    200.58 Å    210.42 Å<br>90.00°    90.00°    90.00° |
| Resolution (Å)                                           | 142.86 – 2.95<br>19.70 – 2.86                                  |
| % Data completeness<br>(in resolution range)             | 79.1 (142.86 – 2.95)<br>77.7 (19.70 – 2.86)                    |
| $R_{sym}$                                                | Not available                                                  |
| $R_{merge}$                                              | Not available                                                  |
| R, $R_{free}$                                            | 0.218, 0.295<br>0.255, 0.258                                   |
| Anisotropy                                               | 0.061                                                          |

|                                                                                |                 |
|--------------------------------------------------------------------------------|-----------------|
| Total number of atoms                                                          | 23716           |
| Wilson B-factor ( $\text{\AA}^2$ )                                             | 32.1            |
| Refinement program                                                             | REFMAC 5.2.0019 |
| Bulk solvent $\kappa_{sol}$ ( $e/\text{\AA}^3$ ), $B_{sol}$ ( $\text{\AA}^2$ ) | 0.29, -18.6     |
| Average B, all atoms ( $\text{\AA}^2$ )                                        | 24.0            |

1 **Table S3.** Predicted binding free energies of **Data set 4** and the reference OSC by  
2 MM/PBSA and MM/GBSA methods.

| Compound     | VDW    | EEL    | $\Delta G_{gas}$ | $\Delta G_{GB}$ | $\Delta G_{SA}$ | $\Delta G_{solv}(GB)$ | $\Delta G_{bind}(GB)$ | $\Delta G_{PB}$ | $\Delta G_{SA}$ | $\Delta G_{solv}(PB)$ | $\Delta G_{bind}(PB)$ |
|--------------|--------|--------|------------------|-----------------|-----------------|-----------------------|-----------------------|-----------------|-----------------|-----------------------|-----------------------|
| OSC          | -30.36 | -24.18 | -54.54           | 45.44           | -4.30           | 41.14                 | -13.40                | 48.15           | -3.69           | 44.46                 | -10.08                |
| ZINC05250774 | -30.22 | -13.72 | -43.94           | 30.46           | -3.69           | 26.77                 | -17.18                | 32.32           | -3.22           | 29.10                 | -14.84                |
| ZINC57589121 | -23.77 | -13.25 | -37.02           | 24.79           | -3.23           | 21.56                 | -15.46                | 25.56           | -2.86           | 22.70                 | -14.32                |
| ZINC08458181 | -19.60 | -8.80  | -28.40           | 18.22           | -2.56           | 15.66                 | -12.73                | 17.47           | -2.33           | 15.15                 | -13.25                |

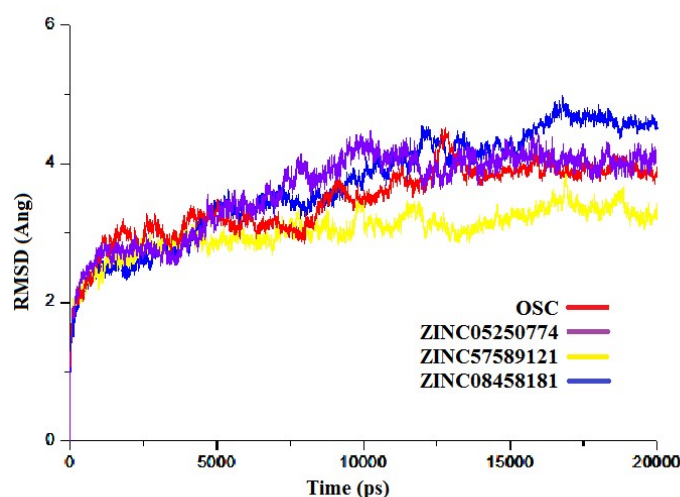

3

4 **Fig. S2** The RMSD values of the compounds of **Data set 4** and reference OSC with  
5 NA versus simulation time.

### 6 **3. Chemistry materials and methods**

7 All the chemical reagents were commercially available reagents without further  
8 purification. To monitor the reaction by thin layer chromatography (TLC) with  
9 precoated silica gel 60 F254.  $^1\text{H}$  NMR and  $^{13}\text{C}$  NMR spectra were recorded on a  
10 Bruker AVANCE III at 400 MHz, 100 MHz in DMSO- $d_6$  using TMS ( $\delta = 2.50$  ppm)  
11 as internal standard. Chemical shifts are reported in  $\delta$  (parts per million (ppm)) with  
12 TMS and coupling constants ( $J$ ) in Hz. HRMS were recorded on a solarix 70 FTMS  
13 spectrometer (Bruker) using methanol and acetonitrile as the solvent. Data were

1 acquired in the positive ion mode at resolving power of 100,000. Melting points were  
2 measured using a WRS-2A digital melting point apparatus (Shanghai Shengguang  
3 Instrument Co., Ltd., Shanghai China). Analytic HPLC was performed on Agilent  
4 technologies 1260 series with water contains 0.1% CH<sub>3</sub>COOH (Solvent B,  
5 40%)/CH<sub>3</sub>CN (Solvent A, 60%) as eluent and the targeted products were detected by  
6 DAD in the detection rang of 254-320 nm. Product purities were confirmed to be >95%  
7 by this method.

### 8 **3.1 General procedure for synthesis of 7**

9 A mixture of the substituted aniline (20 mmol) and triethylamine (4.17 mL, 30  
10 mmol) in ethyl acetate (80.00 mL) was stirred at 0°C. Oxalyl chloride monoethyl ester  
11 (3.36 mL, 30 mmol) was added dropwise to a cooled stirred mixture for 0.5 h. This  
12 solution was stirred at room temperature for 6 h. After the reaction was completed, the  
13 reaction mixture was quenched with distilled water and then was extracted three times  
14 with 100 mL of ethyl acetate. After separation of the phases, the organic layer was  
15 washed twice with 1 M hydrochloric acid and twice with saturated sodium  
16 bicarbonate solution, followed by drying with anhydrous sodium sulfate and  
17 evaporation of the solvent in vacuo. The crude product was purified by column  
18 chromatography to obtain the compound 7.

#### 19 ***ethyl 2-((3-chlorobenzyl)amino)-2-oxoacetate(7a)***

20 White solid, yield 88.7%, <sup>1</sup>H NMR (400 MHz, DMSO-d<sub>6</sub>) δ 8.48 (t, *J* = 6.1 Hz, 1H),  
21 7.37 – 7.28 (m, 3H), 7.20-7.17 (m, 1H), 4.41 (dt, *J* = 6.2, 1.0 Hz, 2H), 4.30 (q, *J* = 7.1  
22 Hz, 2H), 1.40 (t, *J* = 7.1 Hz, 3H). <sup>13</sup>C NMR (100 MHz, DMSO-d<sub>6</sub>) δ 161.88, 161.31,  
23 138.62, 133.61, 129.55, 127.80, 127.76, 126.39, 62.98, 43.45, 13.99.

#### 24 ***ethyl 2-((2-methoxy-5-methylphenyl)amino)-2-oxoacetate(7b)***

25 Yellow solid, yield 87.3%, <sup>1</sup>H NMR (400 MHz, DMSO-d<sub>6</sub>) δ 10.54 (s, 1H), 8.24 (d, *J*  
26 = 1.9 Hz, 1H), 7.15 – 6.99 (m, 2H), 4.34 (q, *J* = 7.1 Hz, 2H), 3.88 (s, 3H), 2.30 (s, 3H),  
27 1.40 (t, *J* = 7.0 Hz, 3H). <sup>13</sup>C NMR (100 MHz, DMSO-d<sub>6</sub>) δ 161.01, 156.66, 146.66,  
28 133.41, 127.30, 124.18, 120.89, 111.82, 62.98, 56.01, 20.97, 14.39.

#### 29 ***ethyl 2-((4-nitrophenyl)amino)-2-oxoacetate(7c)***

30 White solid, yield 89.1%, <sup>1</sup>H NMR (400 MHz, DMSO-d<sub>6</sub>) δ 8.30 – 8.19 (m, 4H), 4.35  
31 (q, *J* = 7.1 Hz, 2H), 1.38 (t, *J* = 7.1 Hz, 3H). <sup>13</sup>C NMR (100 MHz, DMSO-d<sub>6</sub>) δ  
32 161.35, 156.44, 143.41, 141.60, 125.52, 118.04, 62.99, 13.95.

### 33 **3.2 General procedure for synthesis of 8**

34 Potassium hydroxide (1.68 g, 30 mmol) dissolved in 5 mL of distilled water was



1 added to a solution of compound **7** (10 mmol) in 150 mL ethanol at 0 °C. The reaction  
2 mixture was allowed to warm to room temperature and stirred for additional 4 h. After  
3 the reaction was completed, 100 mL of distilled water was added to the reaction  
4 solution and the solution was acidified with concentrated hydrochloric acid to pH 1.  
5 After removing the solvent in vacuo, compound **8** was recrystallized from water.

6 **2-((3-chlorobenzyl)amino)-2-oxoacetic acid(8a)**

7 White solid, yield 82.6%, <sup>1</sup>H NMR (400 MHz, DMSO-d<sub>6</sub>) δ 9.13 (s, 1H), 8.55 (t, *J* =  
8 6.1 Hz, 1H), 7.36 – 7.25 (m, 3H), 7.20-7.17 (m, 1H), 4.49(dt, *J* = 6.0, 0.9 Hz, 2H). <sup>13</sup>C  
9 NMR (100 MHz, DMSO-d<sub>6</sub>) δ 162.85, 162.80, 138.59, 133.77, 129.47, 127.90,  
10 126.74, 126.31, 43.64.

11 **2-((2-methoxy-5-methylphenyl)amino)-2-oxoacetic acid(8b)**

12 Yellow solid, yield 83.5%, <sup>1</sup>H NMR (400 MHz, DMSO-d<sub>6</sub>) δ 10.12 (s, 1H), 9.39 (s,  
13 1H), 8.17 (d, *J* = 1.8 Hz, 1H), 7.10 – 6.99 (m, 2H), 3.91 (s, 3H), 2.36 (s, 3H). <sup>13</sup>C  
14 NMR (100 MHz, DMSO-d<sub>6</sub>) δ 162.60, 161.18, 146.91, 133.33, 127.69, 124.09,  
15 120.87, 111.65, 56.01, 20.94.

16 **2-((4-nitrophenyl)amino)-2-oxoacetic acid(8c)**

17 White solid, yield 81.7%, <sup>1</sup>H NMR (400 MHz, DMSO-d<sub>6</sub>) δ 9.50 (s, 1H), 8.36 – 8.27  
18 (m, 2H), 8.22 – 8.15 (m, 2H). <sup>13</sup>C NMR (100 MHz, DMSO-d<sub>6</sub>) δ 163.02, 160.85,  
19 143.60, 142.33, 125.49, 118.14.

20 **3.3 General procedure for synthesis of target compounds Z1-Z10**

21 Compound **8** (5 mmol) and substituted aniline (7.5 mmol) were dissolved in DMF  
22 (50 mL), and then HOBt (1.35g, 10 mmol) and EDCI (3.35g, 17.5 mmol) were added  
23 into the solution. The reaction mixture was stirred at 25 °C for 6 h under nitrogen flow  
24 condition. After completion of the reaction, the precipitate was filtered, washed by  
25 distilled water. The crude product was recrystallized by 95% aqueous ethanol to give  
26 the appropriate target compounds **Z1-Z10**.

27 **N<sup>1</sup>-(3-chlorobenzyl)-N<sup>2</sup>-(3,4,5-trimethoxyphenyl)oxalamide (Z1)**. White solid, yield  
28 81%, m.p.215.5-215.7°C, purity 98.66%; <sup>1</sup>H NMR (400 MHz, DMSO-d<sub>6</sub>) δ 10.55 (s,  
29 1H), 9.59 (t, *J* = 6.4 Hz, 1H), 7.42 – 7.29 (m, 6H), 4.42 (d, *J* = 6.4 Hz, 2H), 3.77 (s,  
30 6H), 3.66 (s, 3H). <sup>13</sup>C NMR (100 MHz, DMSO-d<sub>6</sub>) δ 160.75, 158.67, 153.11, 141.66,  
31 134.82, 134.11, 133.46, 130.71, 127.71, 127.43, 126.54, 98.79, 60.58, 56.23, 42.58.  
32 HRMS (ESI) calcd for C<sub>18</sub>H<sub>19</sub>ClN<sub>2</sub>O<sub>5</sub>[M+Na]<sup>+</sup>: 401.0875; Found: 401.0871.

33 **N<sup>1</sup>-(3-chlorobenzyl)-N<sup>2</sup>-(3-hydroxy-4-methoxyphenyl)oxalamide (Z2)**. Brown solid,  
34 yield 85%, m.p.172.4-173.4°C, purity 98.68%; <sup>1</sup>H NMR (400 MHz, DMSO-d<sub>6</sub>) δ

1 10.39 (s, 1H), 9.52 (t,  $J = 6.4$  Hz, 1H), 9.07 (s, 1H), 7.41 – 7.36 (m, 3H), 7.34 (dd,  $J =$   
2 6.5, 1.7 Hz, 1H), 7.29 (d,  $J = 7.3$  Hz, 1H), 7.20 (dd,  $J = 8.7, 2.5$  Hz, 1H), 6.89 (d,  $J =$   
3 8.8 Hz, 1H), 4.40 (d,  $J = 6.4$  Hz, 2H), 3.76 (s, 3H).  $^{13}\text{C}$  NMR (100 MHz, DMSO- $d_6$ )  $\delta$   
4 161.00, 158.37, 146.76, 145.23, 141.75, 133.43, 131.54, 130.71, 127.79, 127.42,  
5 126.62, 112.73, 111.84, 109.20, 56.34, 42.58. HRMS (ESI) calcd for  
6  $\text{C}_{16}\text{H}_{15}\text{ClN}_2\text{O}_4[\text{M}+\text{Na}]^+$ : 357.0613; Found: 357.0607.

7 ***N*<sup>1</sup>-(3-chlorobenzyl)-*N*<sup>2</sup>-(3-fluorophenethyl)oxalamide (Z3)**. White solid, yield 79%,  
8 m.p.142.5-143.5°C, purity 98.39%;  $^1\text{H}$  NMR (400 MHz, DMSO- $d_6$ )  $\delta$  9.35 (t,  $J = 6.4$   
9 Hz, 1H), 8.85 (t,  $J = 5.9$  Hz, 1H), 7.40 – 7.30 (m, 4H), 7.22 (d,  $J = 7.3$  Hz, 1H), 7.09 –  
10 7.00 (m, 3H), 4.33 (d,  $J = 6.5$  Hz, 2H), 3.43 (dd,  $J = 13.6, 6.9$  Hz, 2H), 2.84 (t,  $J = 7.2$   
11 Hz, 2H).  $^{13}\text{C}$  NMR (100 MHz, DMSO- $d_6$ )  $\delta$  163.87, 161.46, 160.68, 160.27, 142.61,  
12 141.79, 133.41, 130.67, 130.54, 127.63, 127.36, 126.47, 125.28, 115.89, 113.32,  
13 42.33, 34.62. HRMS (ESI) calcd for  $\text{C}_{17}\text{H}_{16}\text{ClF}_2\text{O}_2[\text{M}+\text{H}]^+$ : 335.0957; Found:  
14 335.0961.

15 ***N*<sup>1</sup>-(2-(benzo[d][1,3]dioxol-5-yl)ethyl)-*N*<sup>2</sup>-(3-chlorobenzyl)oxalamide (Z4)**. White  
16 solid, yield 89%, m.p.151.9-153.1°C, purity 99.43%;  $^1\text{H}$  NMR (400 MHz, DMSO- $d_6$ )  
17  $\delta$  9.34 (t,  $J = 6.4$  Hz, 1H), 8.76 (t,  $J = 5.9$  Hz, 1H), 7.37 – 7.30 (m, 3H), 7.23 (d,  $J =$   
18 7.3 Hz, 1H), 6.81 (dd,  $J = 7.6, 4.6$  Hz, 2H), 6.66 (dd,  $J = 7.9, 1.5$  Hz, 1H), 5.98 (s,  
19 2H), 4.33 (d,  $J = 6.5$  Hz, 2H), 3.40 – 3.35 (m, 2H), 2.73 (t,  $J = 7.3$  Hz, 2H).  $^{13}\text{C}$  NMR  
20 (100 MHz, DMSO- $d_6$ )  $\delta$  160.75, 160.22, 147.69, 146.04, 141.80, 133.42, 133.36,  
21 130.68, 127.66, 127.37, 126.50, 121.98, 109.44, 108.57, 101.15, 42.35, 41.00, 34.72.  
22 HRMS (ESI) calcd for  $\text{C}_{18}\text{H}_{17}\text{Cl}_2\text{O}_4[\text{M}+\text{NH}_4]^+$ : 378.1215; Found: 378.1221.

23 ***N*<sup>1</sup>-(3-chlorobenzyl)-*N*<sup>2</sup>-(2-methoxy-5-methylphenyl)oxalamide (Z5)**. Yellow solid,  
24 yield 78%, m.p.168.0-169.2°C, purity 99.53%;  $^1\text{H}$  NMR (400 MHz, DMSO- $d_6$ )  $\delta$  9.75  
25 (s, 1H), 9.68 (t,  $J = 6.4$  Hz, 1H), 8.02 (d,  $J = 1.5$  Hz, 1H), 7.42 – 7.27 (m, 4H), 7.03 –  
26 6.95 (m, 2H), 4.41 (d,  $J = 6.4$  Hz, 2H), 3.87 (s, 2H), 2.28 (s, 3H).  $^{13}\text{C}$  NMR (100 MHz,  
27 DMSO- $d_6$ )  $\delta$  160.53, 157.52, 147.30, 141.46, 133.46, 130.73, 129.95, 127.81, 127.50,  
28 126.66, 125.91, 120.50, 111.53, 56.53, 42.80, 21.03. HRMS (ESI) calcd for  
29  $\text{C}_{17}\text{H}_{17}\text{ClN}_2\text{O}_3[\text{M}+\text{Na}]^+$ : 355.0820; Found: 355.0824.

30 ***N*<sup>1</sup>-(3-hydroxy-4-methoxyphenyl)-*N*<sup>2</sup>-(2-methoxy-5-methylphenyl)oxalamide (Z6)**.  
31 Brown solid, yield 86%, m.p.175.8-176.6°C, purity 99.08%;  $^1\text{H}$  NMR (400 MHz,  
32 DMSO- $d_6$ )  $\delta$  10.67 (s, 1H), 9.86 (s, 1H), 9.12 (s, 1H), 8.05 (s, 1H), 7.41 (s, 1H), 7.26  
33 (d,  $J = 8.7$  Hz, 1H), 7.02 (dd,  $J = 17.7, 8.3$  Hz, 2H), 6.92 (d,  $J = 8.7$  Hz, 1H), 3.89 (s,  
34 3H), 3.77 (s, 3H), 2.30 (s, 3H).  $^{13}\text{C}$  NMR (100 MHz, DMSO- $d_6$ )  $\delta$  158.17, 157.89,  
35 147.40, 146.79, 145.48, 131.29, 129.96, 128.06, 125.98, 120.56, 112.65, 112.09,

1 111.59, 109.40, 56.32, 21.08. HRMS (ESI) calcd for C<sub>17</sub>H<sub>18</sub>N<sub>2</sub>O<sub>5</sub>[M+H]<sup>+</sup>: 331.1288;  
2 Found: 331.1291.

3 ***N*<sup>1</sup>-(3-fluorophenethyl)-*N*<sup>2</sup>-(2-methoxy-5-methylphenyl)oxalamide (Z7)**. White solid,  
4 yield 83%, m.p.104.5-105.4°C, purity 99.67%; <sup>1</sup>H NMR (400 MHz, DMSO-*d*<sub>6</sub>) δ 9.72  
5 (s, 1H), 9.13 (t, *J* = 5.5 Hz, 1H), 8.01 (s, 1H), 7.35 (dd, *J* = 14.7, 7.5 Hz, 1H), 7.11 –  
6 6.93 (m, 5H), 3.87 (s, 3H), 3.47 (dd, *J* = 13.6, 6.8 Hz, 2H), 2.88 (t, *J* = 7.2 Hz, 2H),  
7 2.27 (s, 3H). <sup>13</sup>C NMR (100 MHz, DMSO-*d*<sub>6</sub>) δ 161.48, 160.17, 157.57, 147.20,  
8 142.44, 130.70, 129.96, 125.90, 125.85, 125.31, 120.33, 115.71, 113.58, 111.52,  
9 56.53, 40.85, 34.51, 21.03. HRMS (ESI) calcd for C<sub>18</sub>H<sub>19</sub>FN<sub>2</sub>O<sub>3</sub>[M+Na]<sup>+</sup>: 353.1272;  
10 Found: 353.1274.

11 ***N*<sup>1</sup>-(2-(benzo[d][1,3]dioxol-5-yl)ethyl)-*N*<sup>2</sup>-(2-methoxy-5-methylphenyl)oxalamide**  
12 **(Z8)**. White solid, yield 88%, m.p.141.5-142.4°C, purity 97.75%; <sup>1</sup>H NMR (400 MHz,  
13 DMSO-*d*<sub>6</sub>) δ 9.73 (s, 1H), 9.07 (s, 1H), 7.99 (d, *J* = 19.0 Hz, 1H), 7.05 – 6.95 (m, 2H),  
14 6.83 (d, *J* = 9.1 Hz, 2H), 6.68 (d, *J* = 7.9 Hz, 1H), 5.98 (s, 2H), 3.88 (d, *J* = 11.3 Hz,  
15 3H), 3.42 (s, 2H), 2.76 (t, *J* = 7.0 Hz, 2H), 2.29 (d, *J* = 8.9 Hz, 3H). <sup>13</sup>C NMR (100  
16 MHz, DMSO-*d*<sub>6</sub>) δ 160.09, 157.58, 147.66, 147.17, 146.05, 133.23, 129.97, 125.89,  
17 125.83, 122.05, 120.30, 111.48, 109.47, 108.63, 101.15, 56.49, 41.41, 34.58, 21.01.  
18 HRMS (ESI) calcd for C<sub>19</sub>H<sub>20</sub>N<sub>2</sub>O<sub>5</sub>[M+H]<sup>+</sup>: 357.1145; Found: 357.1149.

19 ***N*<sup>1</sup>-(4-nitrophenyl)-*N*<sup>2</sup>-(3,4,5-trimethoxyphenyl)oxalamide (Z9)**. White solid, yield  
20 73%, m.p.193.5-194.3°C, purity 99.17%; <sup>1</sup>H NMR (400 MHz, DMSO-*d*<sub>6</sub>) δ 11.44 (s,  
21 1H), 10.85 (s, 1H), 8.31 (d, *J* = 9.1 Hz, 2H), 8.16 (d, *J* = 9.1 Hz, 2H), 7.38 (s, 2H),  
22 3.79 (s, 6H), 3.67 (s, 3H). <sup>13</sup>C NMR (100 MHz, DMSO-*d*<sub>6</sub>) δ 159.73, 158.19, 153.13,  
23 144.28, 143.74, 134.90, 134.04, 125.27, 120.81, 98.76, 60.60, 56.19. HRMS (ESI)  
24 calcd for C<sub>17</sub>H<sub>17</sub>N<sub>3</sub>O<sub>7</sub>[M+H]<sup>+</sup>: 376.1139; Found: 376.1144.

25 ***N*<sup>1</sup>-(3-chlorobenzyl)-*N*<sup>2</sup>-(4-nitrophenyl)oxalamide (Z10)**. Yellow solid, yield 84%,  
26 m.p.185.9-186.3°C, purity 99.11%; <sup>1</sup>H NMR (400 MHz, DMSO-*d*<sub>6</sub>) δ 11.26 (s, 1H),  
27 9.70 (t, *J* = 6.3 Hz, 1H), 8.28 (d, *J* = 9.2 Hz, 2H), 8.13 (d, *J* = 9.2 Hz, 2H), 7.41 (s,  
28 1H), 7.38 (d, *J* = 7.5 Hz, 1H), 7.34 (d, *J* = 6.6 Hz, 1H), 7.30 (d, *J* = 7.3 Hz, 1H), 4.43  
29 (d, *J* = 6.4 Hz, 2H). <sup>13</sup>C NMR (100 MHz, DMSO-*d*<sub>6</sub>) δ 160.20, 159.73, 144.28, 143.69,  
30 141.51, 133.46, 130.71, 127.80, 127.47, 126.63, 125.18, 120.89, 42.67. HRMS (ESI)  
31 calcd for C<sub>15</sub>H<sub>12</sub>ClN<sub>3</sub>O<sub>4</sub>[M+Na]<sup>+</sup>: 356.0409; Found: 356.0413.

32

33

34 **4. <sup>1</sup>H NMR, <sup>13</sup>C NMR and HRMS spectra for the target compounds Z1-Z10**

35 **Z1**

1

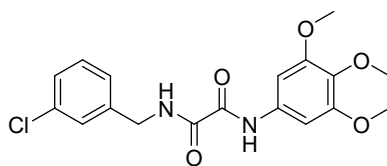

Chemical shift values (ppm): -10.55, 9.61, 9.59, 9.58, 7.41, 7.39, 7.37, 7.35, 7.32, 7.30, 7.29, 4.43, 4.41, 3.77, 3.66.

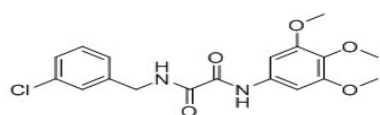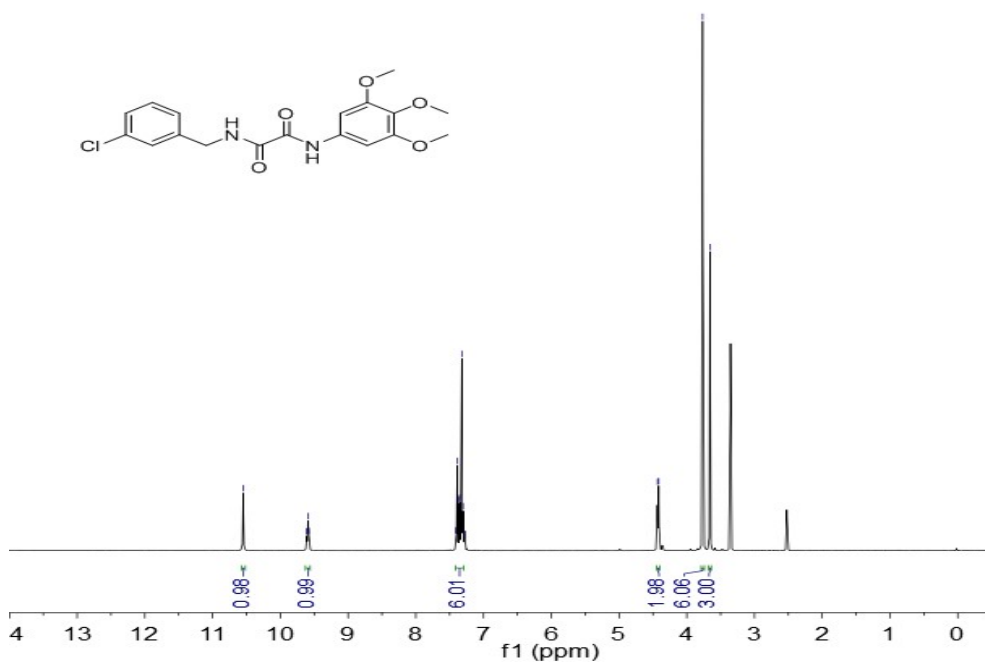

2

Chemical shift values (ppm): 160.75, 158.67, 153.11, 141.66, 134.82, 134.11, 133.46, 130.71, 127.71, 127.43, 126.54, 98.79, 60.58, 56.23, 42.58.

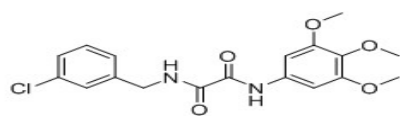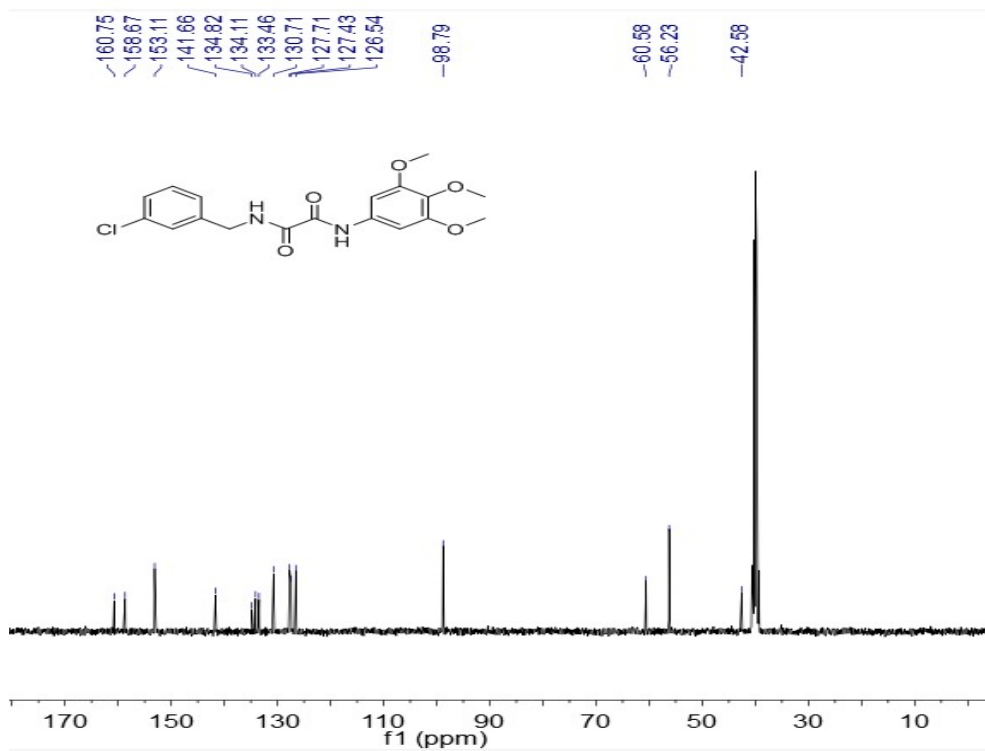

3

## System Verification of Internal Mass Accuracy ESI Mode

| Analysis Info            |                          |                   |     | Acquisition Date      |                          |
|--------------------------|--------------------------|-------------------|-----|-----------------------|--------------------------|
| Analysis Name            | D:\Data\HYY\CLP_000378.d |                   |     | 6/2/2021 2:18:14 PM   |                          |
| Method                   | 4_19_MassAccuNeg         |                   |     | Operator              |                          |
| Sample Name              | 58                       |                   |     | Instrument            |                          |
| Comment                  | Glu-Fib 250amol          |                   |     | solarIX               |                          |
| Acquisition Parameter    |                          |                   |     |                       |                          |
| Polarity                 | Positive                 | n/a               | n/a | No. of Laser Shots    | 200                      |
| n/a                      | n/a                      | No. of Cell Fills | 1   | Laser Power           | 20.0 lp                  |
| Broadband Low Mass       | 53.8 m/z                 | n/a               | n/a | n/a                   | n/a                      |
| Broadband High Mass      | 1000.0 m/z               | n/a               | n/a | n/a                   | n/a                      |
| Acquisition Mode         | Single MS                | n/a               | n/a | Calibration Date      | Fri Feb 21 02:36:54 2014 |
| Pulse Program            | basic                    | n/a               | n/a | Data Acquisition Size | 1048576                  |
| Source Accumulation      | 0.020 sec                | n/a               | n/a | Apodization           | Sine-Bell Multiplication |
| Ion Accumulation Time    | 0.200 sec                | n/a               | n/a |                       |                          |
| Flight Time to Acq. Cell | 0.001 sec                |                   |     |                       |                          |

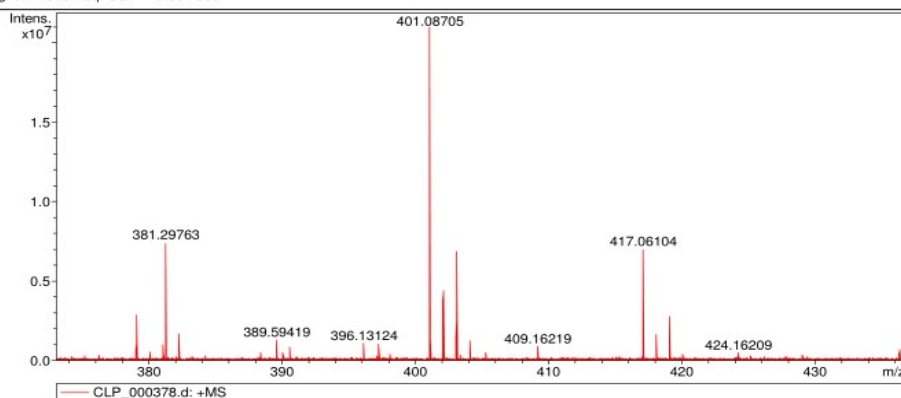

1

2 **Z2**

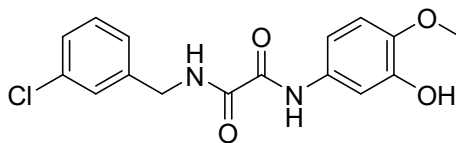

3

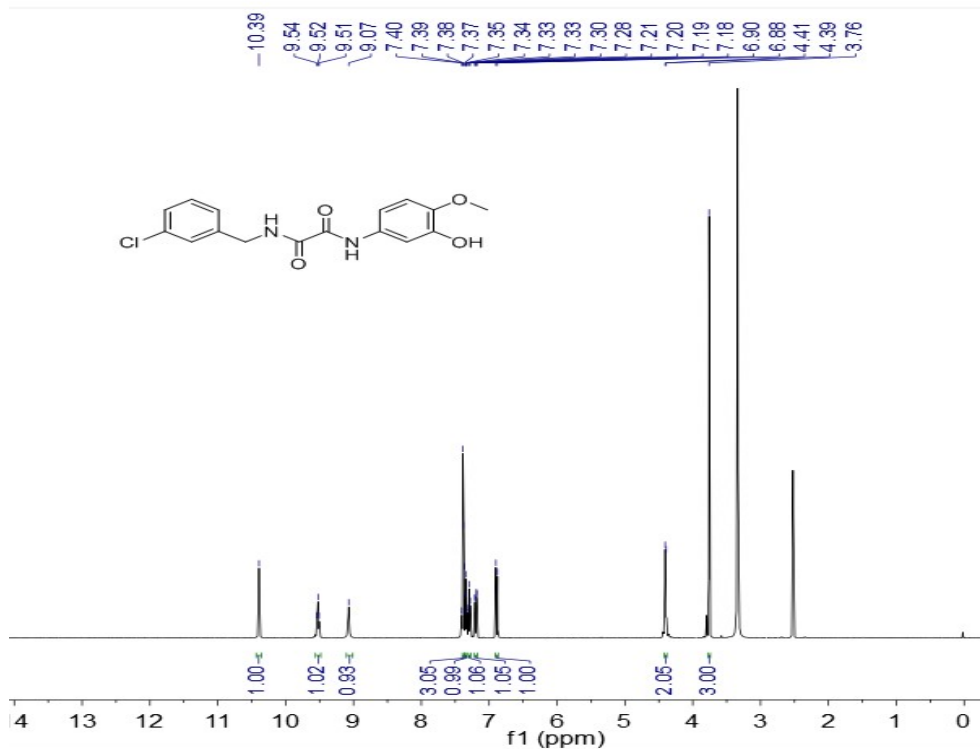

4

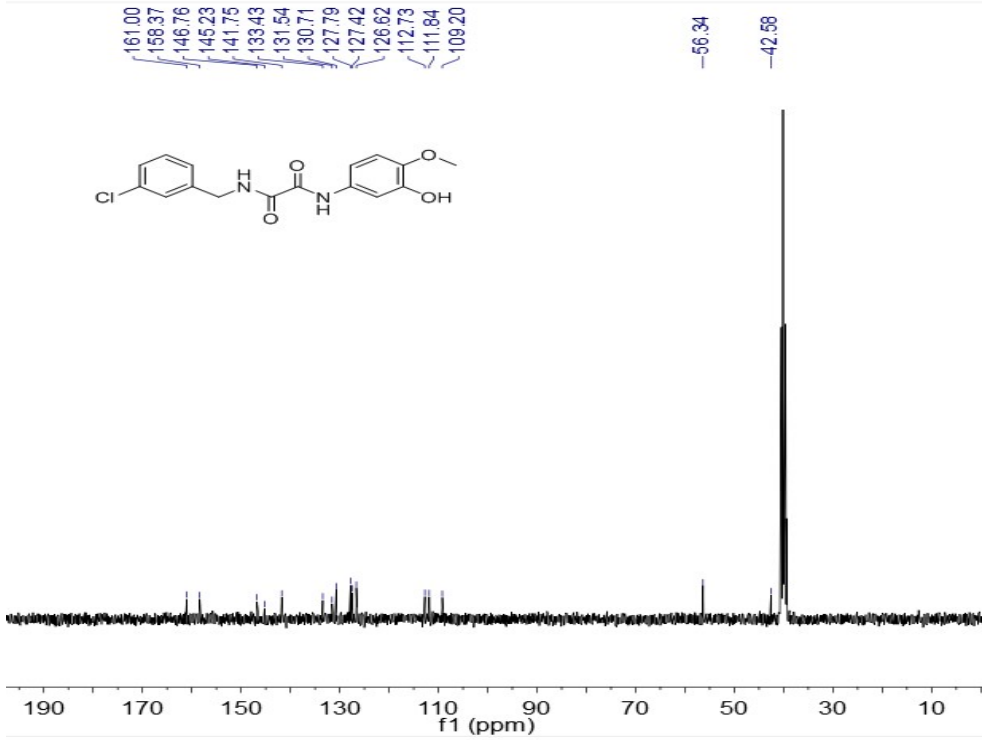

### System Verification of Internal Mass Accuracy ESI Mode

| Analysis Info |                          |  |  | Acquisition Date    |         |
|---------------|--------------------------|--|--|---------------------|---------|
| Analysis Name | D:\Data\HYY\CLP_000391.d |  |  | 6/2/2021 2:35:26 PM |         |
| Method        | 4_19_MassAccuNeg         |  |  | Operator            |         |
| Sample Name   | 58                       |  |  | Instrument          | solariX |
| Comment       | Glu-Fib 250amol          |  |  |                     |         |

| Acquisition Parameter    |            |                   |     |                       |                          |
|--------------------------|------------|-------------------|-----|-----------------------|--------------------------|
| Polarity                 | Positive   | n/a               | n/a | No. of Laser Shots    | 200                      |
| n/a                      | n/a        | No. of Cell Fills | 1   | Laser Power           | 20.0 Ip                  |
| Broadband Low Mass       | 53.8 m/z   | n/a               | n/a | n/a                   | n/a                      |
| Broadband High Mass      | 1000.0 m/z | n/a               | n/a | n/a                   | n/a                      |
| Acquisition Mode         | Single MS  | n/a               | n/a | Calibration Date      | Fri Feb 21 02:36:54 2014 |
| Pulse Program            | basic      | n/a               | n/a | Data Acquisition Size | 2097152                  |
| Source Accumulation      | 0.020 sec  | n/a               | n/a | Apodization           | Sine-Bell Multiplication |
| Ion Accumulation Time    | 0.200 sec  | n/a               | n/a |                       |                          |
| Flight Time to Acq. Cell | 0.001 sec  |                   |     |                       |                          |

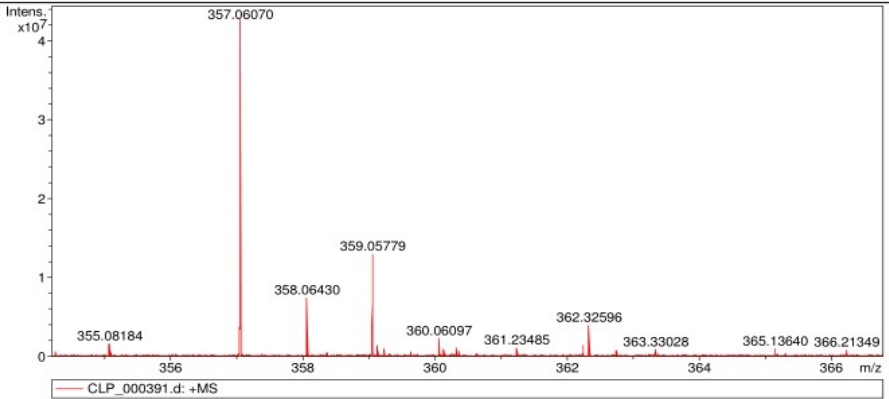

3 **Z3**

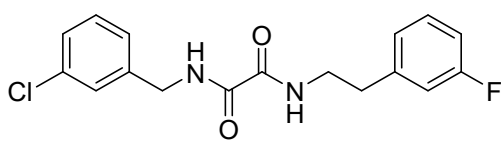

4

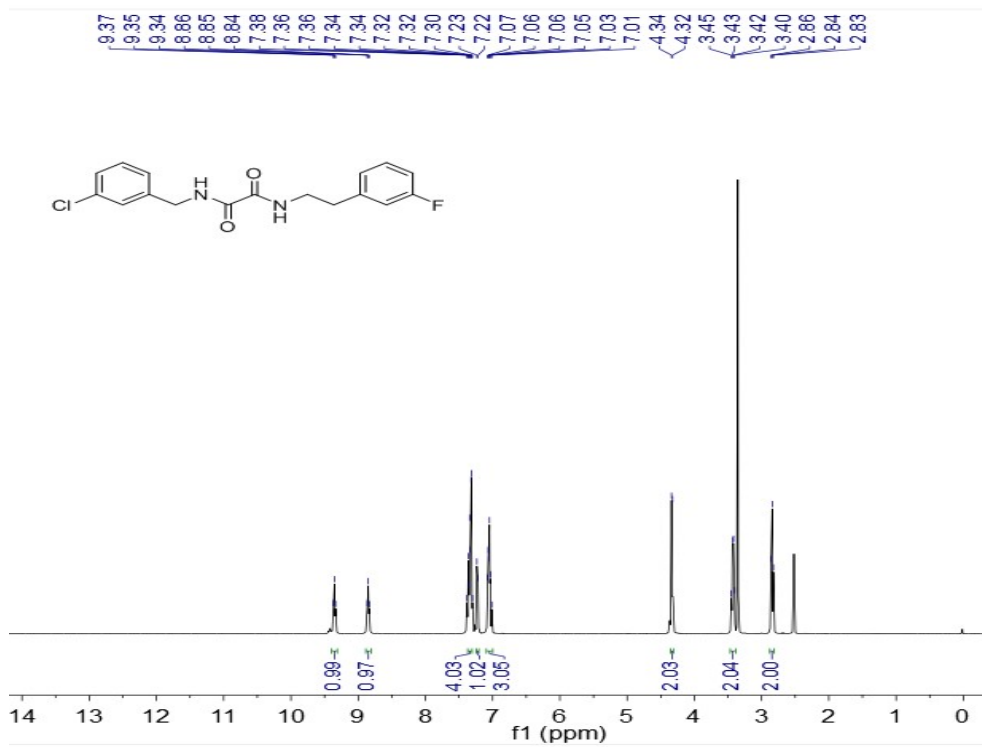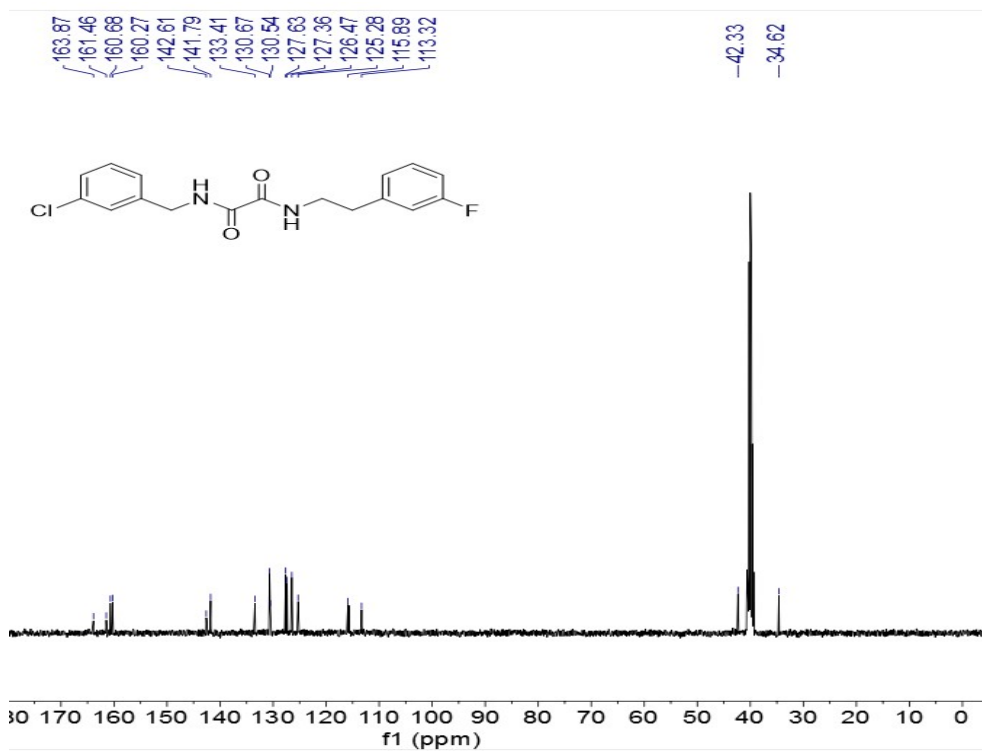

## System Verification of Internal Mass Accuracy ESI Mode

| Analysis Info            |                          |                   |     | Acquisition Date      |                          |
|--------------------------|--------------------------|-------------------|-----|-----------------------|--------------------------|
| Analysis Name            | D:\Data\HYY\CLP_000379.d |                   |     | 6/2/2021 2:22:25 PM   |                          |
| Method                   | 4_19_MassAccuNeg         |                   |     | Operator              |                          |
| Sample Name              | 58                       |                   |     | Instrument            | solarix                  |
| Comment                  | Glu-Fib 250amol          |                   |     |                       |                          |
| Acquisition Parameter    |                          |                   |     |                       |                          |
| Polarity                 | Positive                 | n/a               | n/a | No. of Laser Shots    | 200                      |
| n/a                      | n/a                      | No. of Cell Fills | 1   | Laser Power           | 20.0 lp                  |
| Broadband Low Mass       | 53.8 m/z                 | n/a               | n/a | n/a                   | n/a                      |
| Broadband High Mass      | 1000.0 m/z               | n/a               | n/a | n/a                   | n/a                      |
| Acquisition Mode         | Single MS                | n/a               | n/a | Calibration Date      | Fri Feb 21 02:36:54 2014 |
| Pulse Program            | basic                    | n/a               | n/a | Data Acquisition Size | 1048576                  |
| Source Accumulation      | 0.020 sec                | n/a               | n/a | Apodization           | Sine-Bell Multiplication |
| Ion Accumulation Time    | 0.200 sec                | n/a               | n/a |                       |                          |
| Flight Time to Acq. Cell | 0.001 sec                |                   |     |                       |                          |

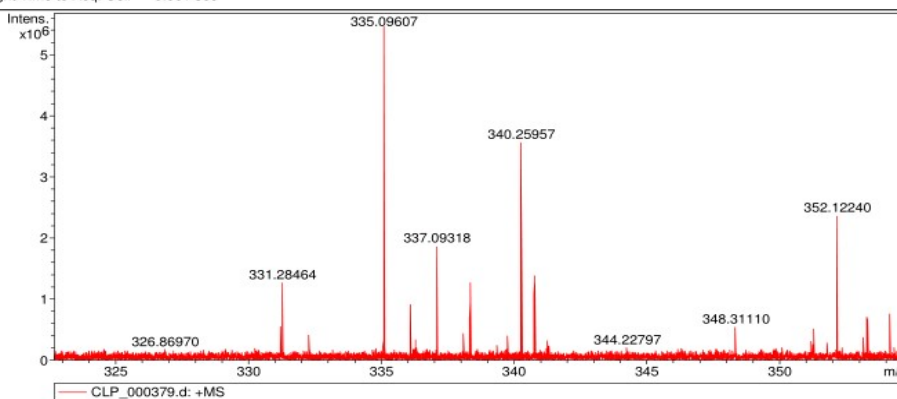

1

2 **Z4**

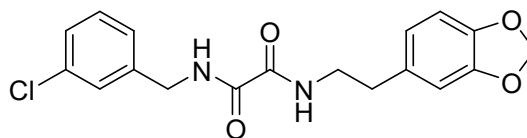

3

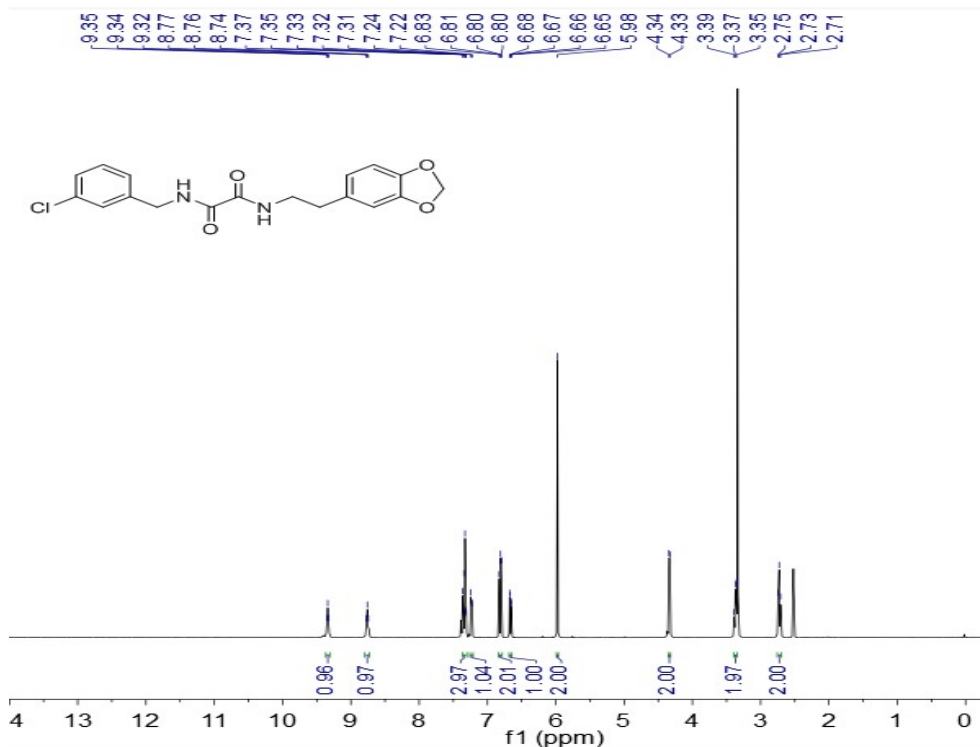

4



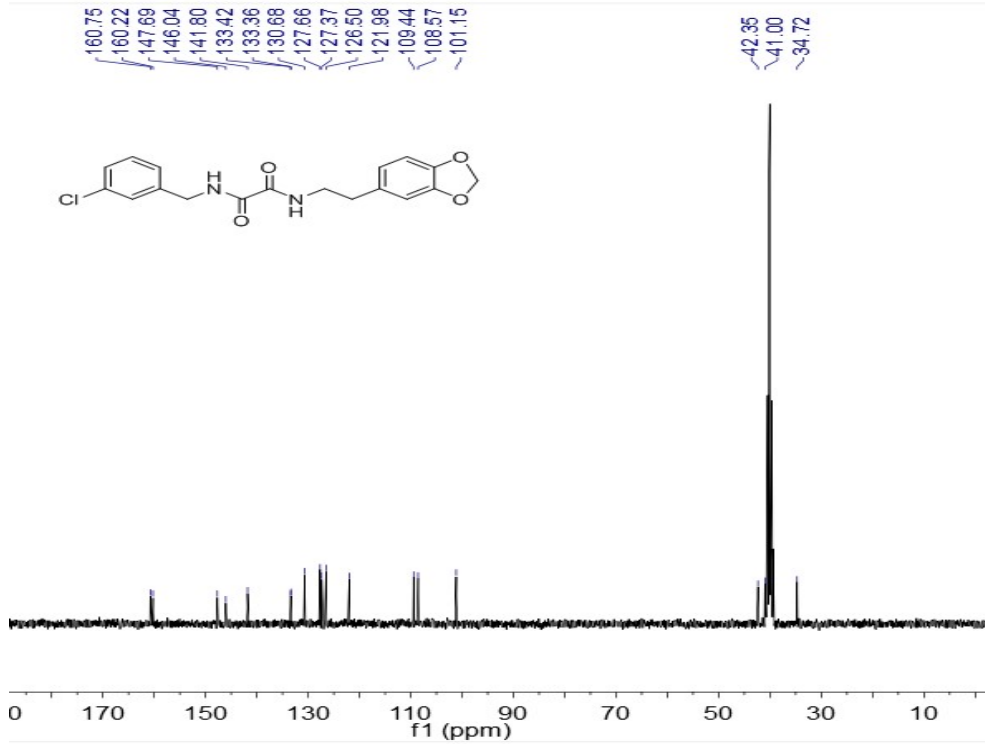

### System Verification of Internal Mass Accuracy ESI Mode

| Analysis Info            |                          |                   |     | Acquisition Date      |                          |
|--------------------------|--------------------------|-------------------|-----|-----------------------|--------------------------|
| Analysis Name            | D:\Data\HYY\CLP_000380.d |                   |     | 6/2/2021 2:25:08 PM   |                          |
| Method                   | 4_19_MassAccuNeg         |                   |     | Operator              |                          |
| Sample Name              | 58                       |                   |     | Instrument            | solariX                  |
| Comment                  | Glu-Fib 250amol          |                   |     |                       |                          |
| Acquisition Parameter    |                          |                   |     |                       |                          |
| Polarity                 | Positive                 | n/a               | n/a | No. of Laser Shots    | 200                      |
| n/a                      | n/a                      | No. of Cell Fills | 1   | Laser Power           | 20.0 Ip                  |
| Broadband Low Mass       | 53.8 m/z                 | n/a               | n/a | n/a                   | n/a                      |
| Broadband High Mass      | 1000.0 m/z               | n/a               | n/a | n/a                   | n/a                      |
| Acquisition Mode         | Single MS                | n/a               | n/a | Calibration Date      | Fri Feb 21 02:36:54 2014 |
| Pulse Program            | basic                    | n/a               | n/a | Data Acquisition Size | 1048576                  |
| Source Accumulation      | 0.020 sec                | n/a               | n/a | Apodization           | Sine-Bell Multiplication |
| Ion Accumulation Time    | 0.200 sec                | n/a               | n/a |                       |                          |
| Flight Time to Acq. Cell | 0.001 sec                |                   |     |                       |                          |

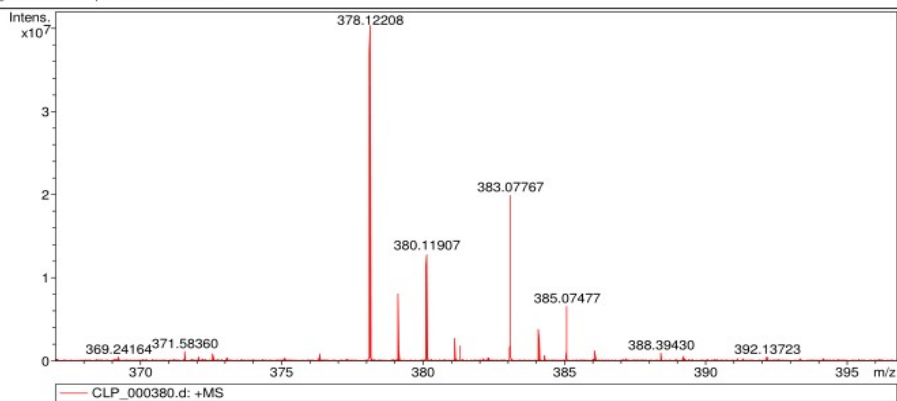

3 Z5

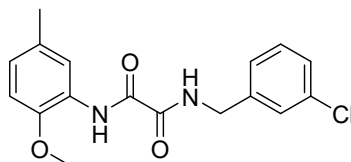

4

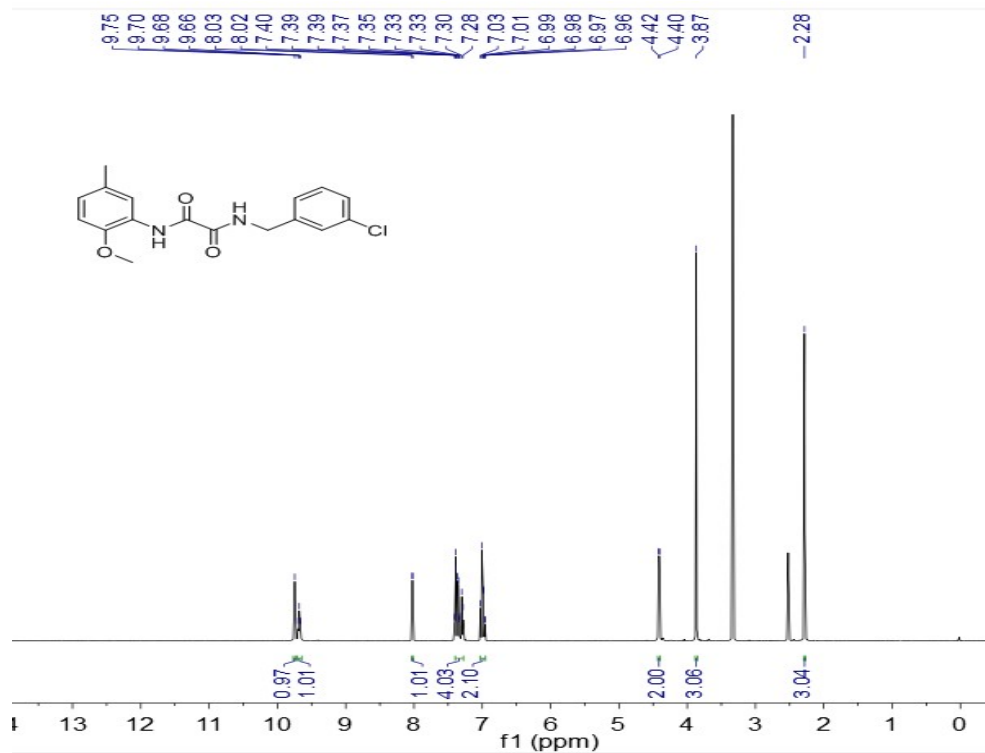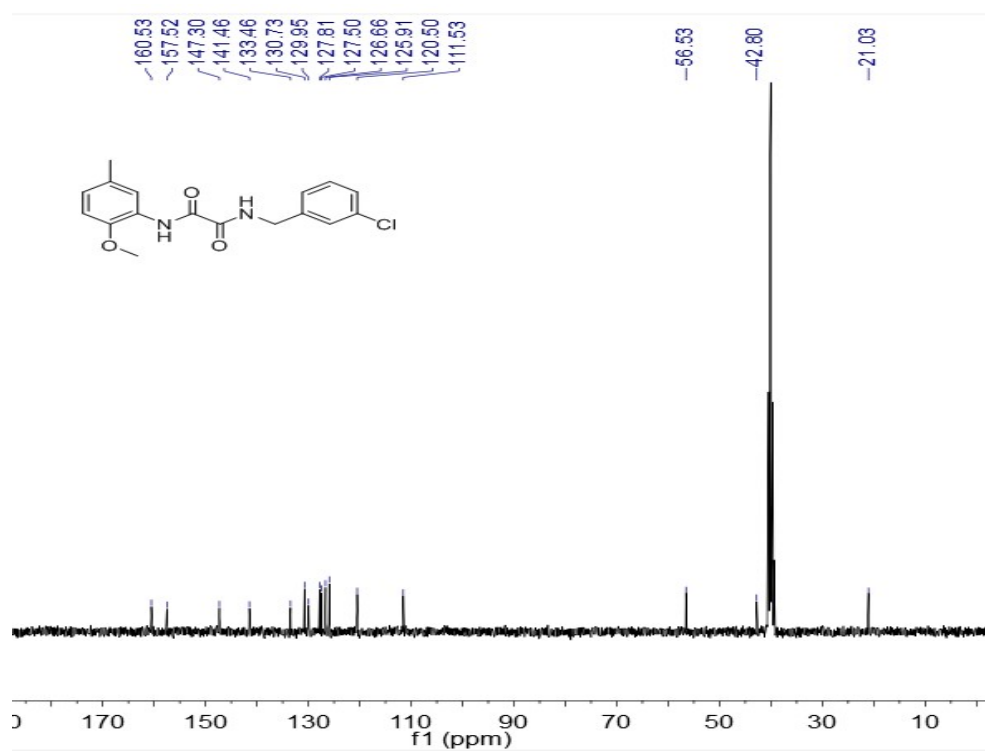

## System Verification of Internal Mass Accuracy ESI Mode

| Analysis Info            |                          |                   |     | Acquisition Date      |                          |
|--------------------------|--------------------------|-------------------|-----|-----------------------|--------------------------|
| Analysis Name            | D:\Data\HYY\CLP_000384.d |                   |     | 6/2/2021 2:30:08 PM   |                          |
| Method                   | 4_19_MassAccuNeg         |                   |     | Operator              | solariX                  |
| Sample Name              | 58                       |                   |     | Instrument            | solariX                  |
| Comment                  | Glu-Fib 250amol          |                   |     |                       |                          |
| Acquisition Parameter    |                          |                   |     |                       |                          |
| Polarity                 | Positive                 | n/a               | n/a | No. of Laser Shots    | 200                      |
| n/a                      | n/a                      | No. of Cell Fills | 1   | Laser Power           | 20.0 lp                  |
| Broadband Low Mass       | 53.8 m/z                 | n/a               | n/a | n/a                   | n/a                      |
| Broadband High Mass      | 1000.0 m/z               | n/a               | n/a | n/a                   | n/a                      |
| Acquisition Mode         | Single MS                | n/a               | n/a | Calibration Date      | Fri Feb 21 02:36:54 2014 |
| Pulse Program            | basic                    | n/a               | n/a | Data Acquisition Size | 1048576                  |
| Source Accumulation      | 0.020 sec                | n/a               | n/a | Apodization           | Sine-Bell Multiplication |
| Ion Accumulation Time    | 0.200 sec                | n/a               | n/a |                       |                          |
| Flight Time to Acq. Cell | 0.001 sec                |                   |     |                       |                          |

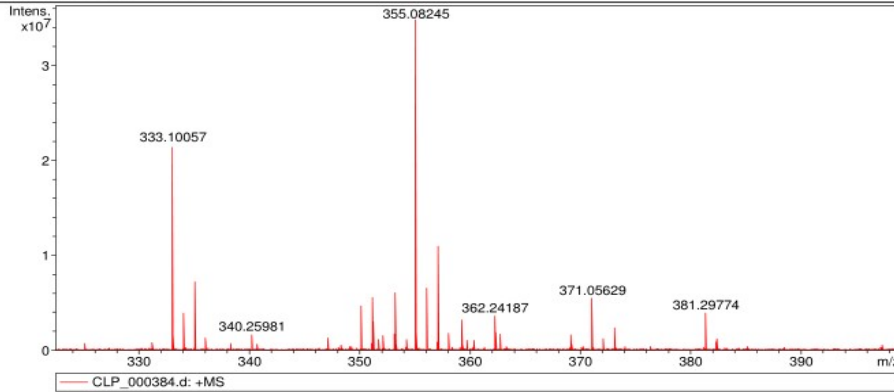

1

2 **Z6**

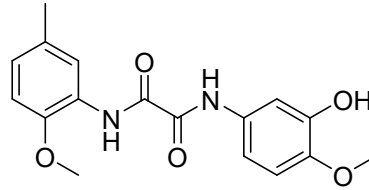

3

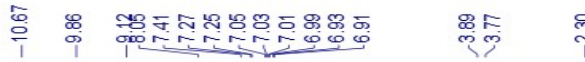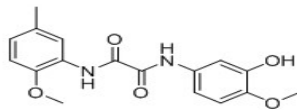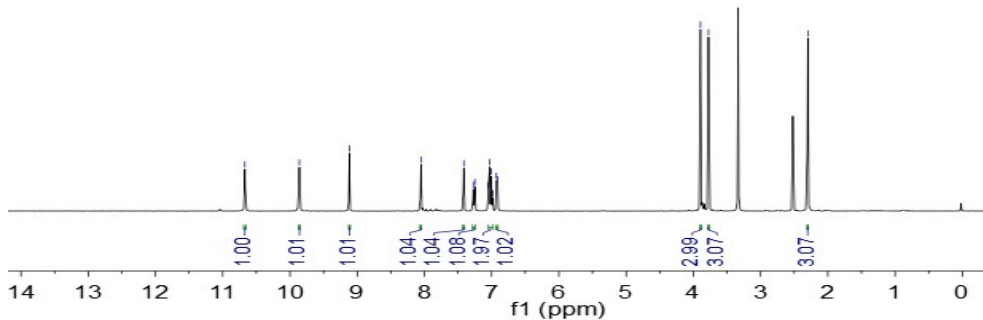

4

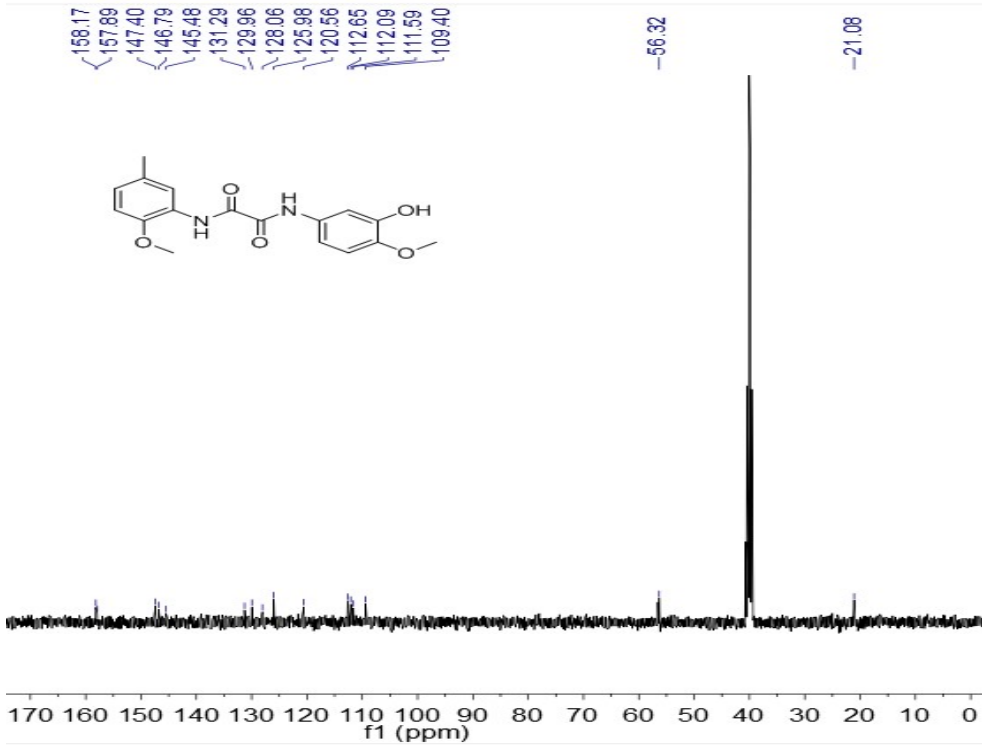

### System Verification of Internal Mass Accuracy ESI Mode

| Analysis Info            |                          |                   |            | Acquisition Date      |                          |
|--------------------------|--------------------------|-------------------|------------|-----------------------|--------------------------|
| Analysis Name            | D:\Data\HYY\CLP_000371.d |                   |            | 5/26/2021 9:37:48 AM  |                          |
| Method                   | 4_19_MassAccuNeg         |                   | Operator   |                       |                          |
| Sample Name              | 58                       |                   | Instrument | solariX               |                          |
| Comment                  | Glu-Fib 250amol          |                   |            |                       |                          |
| Acquisition Parameter    |                          |                   |            |                       |                          |
| Polarity                 | Positive                 | n/a               | n/a        | No. of Laser Shots    | 200                      |
| n/a                      | n/a                      | No. of Cell Fills | 1          | Laser Power           | 20.0 Ip                  |
| Broadband Low Mass       | 53.8 m/z                 | n/a               | n/a        | n/a                   | n/a                      |
| Broadband High Mass      | 1000.0 m/z               | n/a               | n/a        | n/a                   | n/a                      |
| Acquisition Mode         | Single MS                | n/a               | n/a        | Calibration Date      | Fri Feb 21 02:36:54 2014 |
| Pulse Program            | basic                    | n/a               | n/a        | Data Acquisition Size | 1048576                  |
| Source Accumulation      | 0.020 sec                | n/a               | n/a        | Apodization           | Sine-Bell Multiplication |
| Ion Accumulation Time    | 0.200 sec                | n/a               | n/a        |                       |                          |
| Flight Time to Acq. Cell | 0.001 sec                |                   |            |                       |                          |

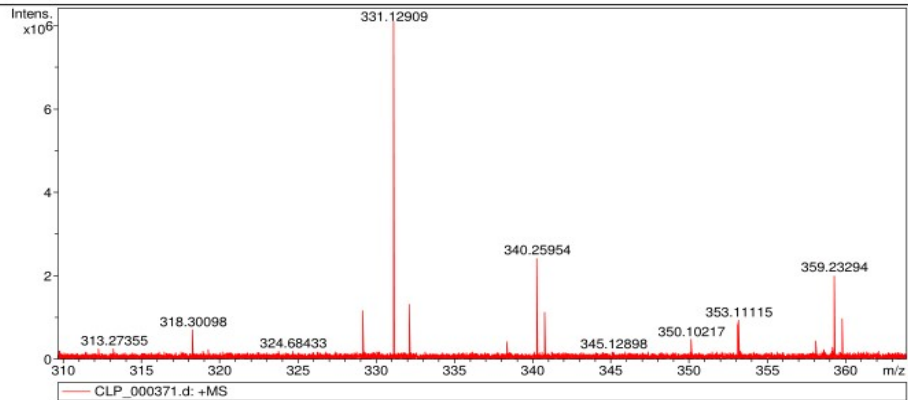

3 Z7

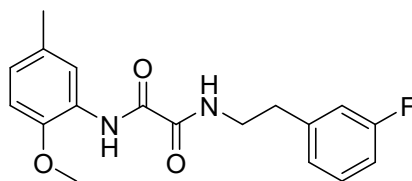

4

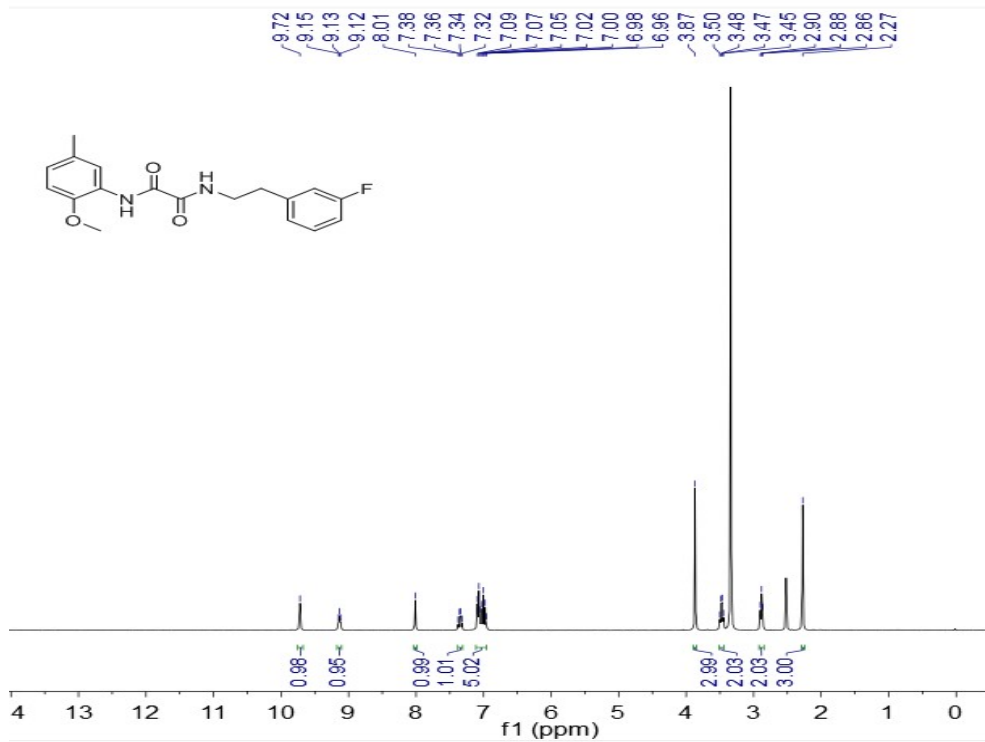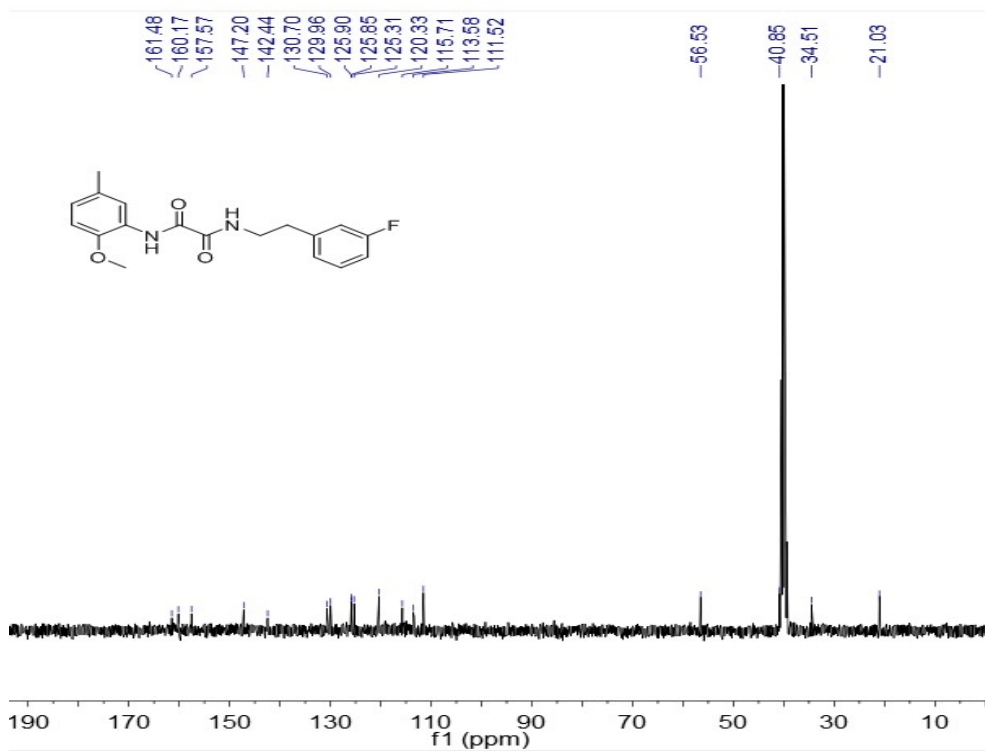

## System Verification of Internal Mass Accuracy ESI Mode

| Analysis Info            |                          |                   |     | Acquisition Date      |                          |
|--------------------------|--------------------------|-------------------|-----|-----------------------|--------------------------|
| Analysis Name            | D:\Data\HYY\CLP_000395.d |                   |     | 6/2/2021 2:41:21 PM   |                          |
| Method                   | 4_19_MassAccuNeg         |                   |     | Operator              |                          |
| Sample Name              | 58                       |                   |     | Instrument            | solariX                  |
| Comment                  | Glu-Fib 250amol          |                   |     |                       |                          |
| Acquisition Parameter    |                          |                   |     |                       |                          |
| Polarity                 | Positive                 | n/a               | n/a | No. of Laser Shots    | 200                      |
| n/a                      | n/a                      | No. of Cell Fills | 1   | Laser Power           | 20.0 lp                  |
| Broadband Low Mass       | 53.8 m/z                 | n/a               | n/a | n/a                   | n/a                      |
| Broadband High Mass      | 1000.0 m/z               | n/a               | n/a | n/a                   | n/a                      |
| Acquisition Mode         | Single MS                | n/a               | n/a | Calibration Date      | Fri Feb 21 02:36:54 2014 |
| Pulse Program            | basic                    | n/a               | n/a | Data Acquisition Size | 1048576                  |
| Source Accumulation      | 0.020 sec                | n/a               | n/a | Apodization           | Sine-Bell Multiplication |
| Ion Accumulation Time    | 0.200 sec                | n/a               | n/a |                       |                          |
| Flight Time to Acq. Cell | 0.001 sec                |                   |     |                       |                          |

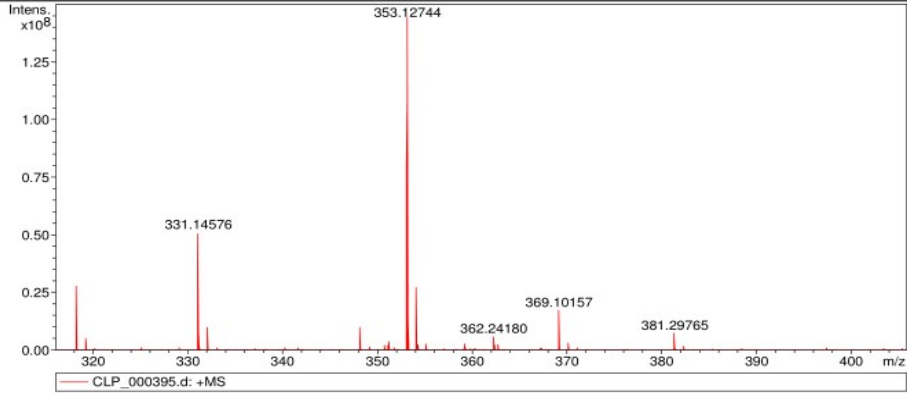

1

2 **Z8**

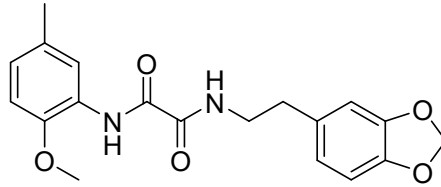

3

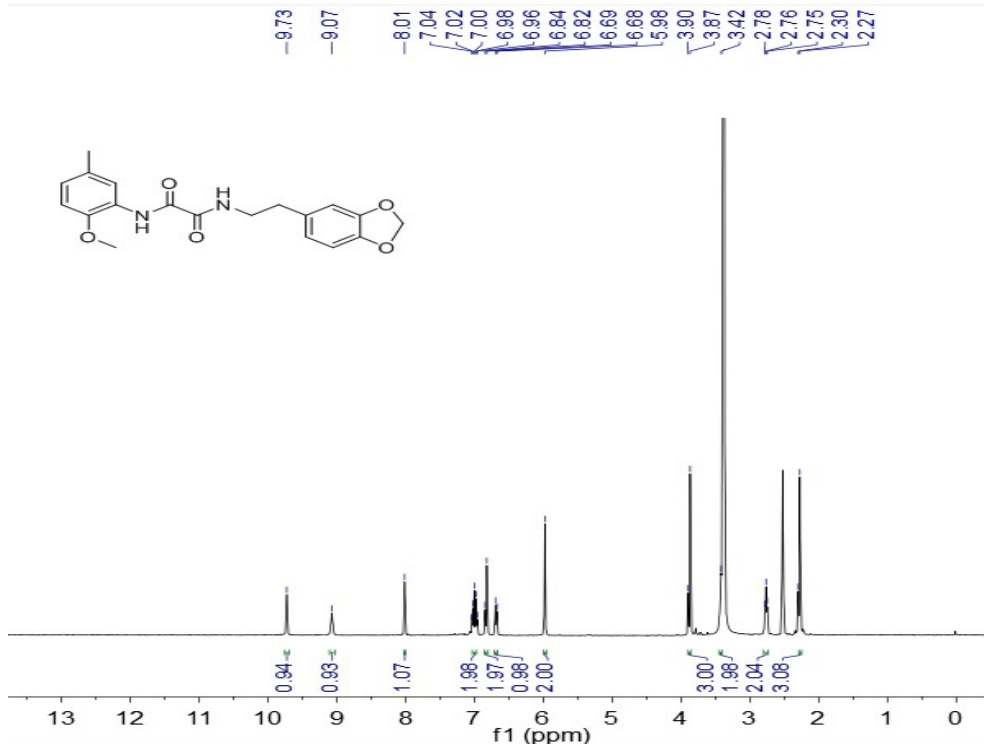

4

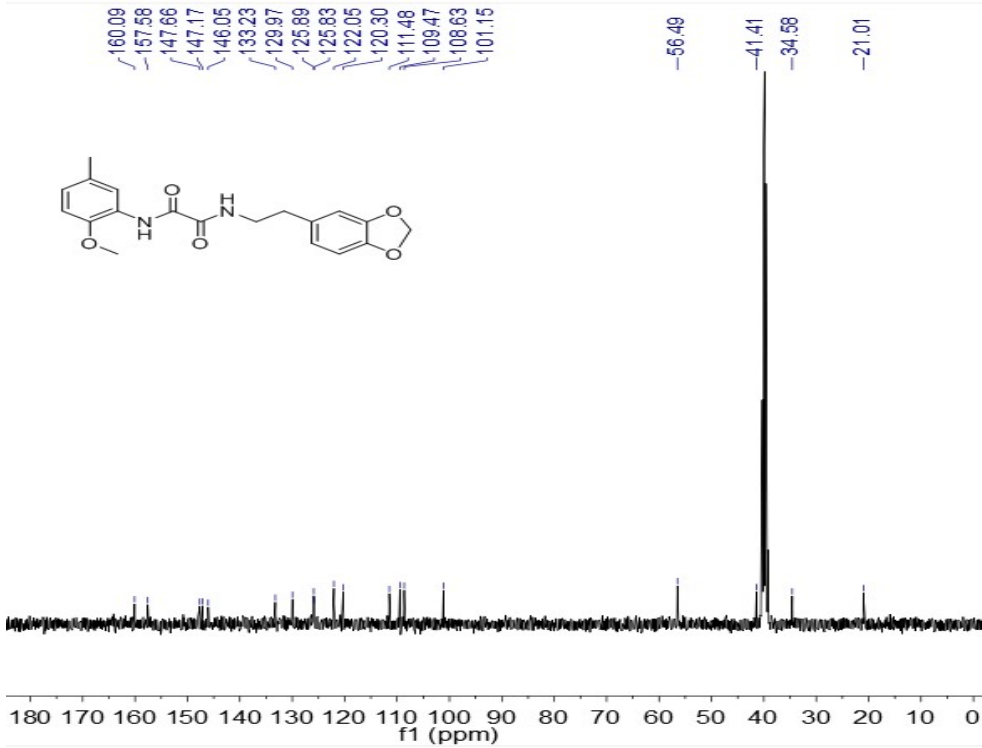

1

### System Verification of Internal Mass Accuracy ESI Mode

| Analysis Info            |                          |                   |     | Acquisition Date      |                          |
|--------------------------|--------------------------|-------------------|-----|-----------------------|--------------------------|
| Analysis Name            | D:\Data\HYY\CLP_000372.d |                   |     | 5/26/2021 9:40:36 AM  |                          |
| Method                   | 4_19_MassAccuNeg         |                   |     | Operator              |                          |
| Sample Name              | 58                       |                   |     | Instrument            | solariX                  |
| Comment                  | Glu-Fib 250amol          |                   |     |                       |                          |
| Acquisition Parameter    |                          |                   |     |                       |                          |
| Polarity                 | Positive                 | n/a               | n/a | No. of Laser Shots    | 200                      |
| n/a                      | n/a                      | No. of Cell Fills | 1   | Laser Power           | 20.0 Ip                  |
| Broadband Low Mass       | 53.8 m/z                 | n/a               | n/a | n/a                   | n/a                      |
| Broadband High Mass      | 1000.0 m/z               | n/a               | n/a | n/a                   | n/a                      |
| Acquisition Mode         | Single MS                | n/a               | n/a | Calibration Date      | Fri Feb 21 02:36:54 2014 |
| Pulse Program            | basic                    | n/a               | n/a | Data Acquisition Size | 1048576                  |
| Source Accumulation      | 0.020 sec                | n/a               | n/a | Apodization           | Sine-Bell Multiplication |
| Ion Accumulation Time    | 0.200 sec                | n/a               | n/a |                       |                          |
| Flight Time to Acq. Cell | 0.001 sec                |                   |     |                       |                          |

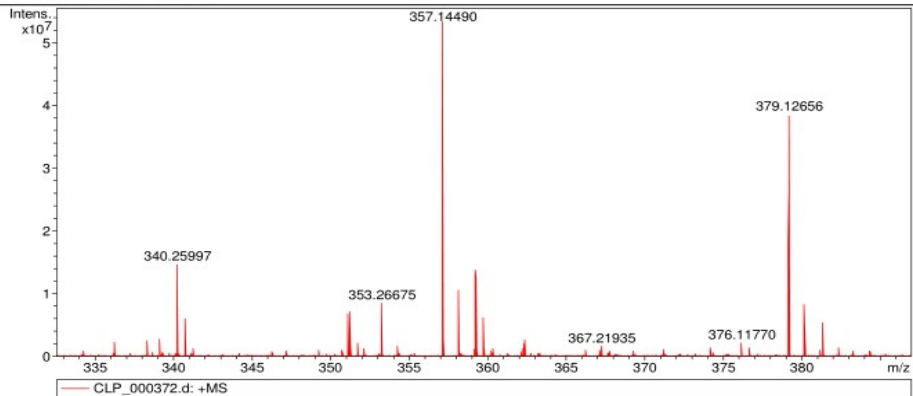

2

3 **Z9**

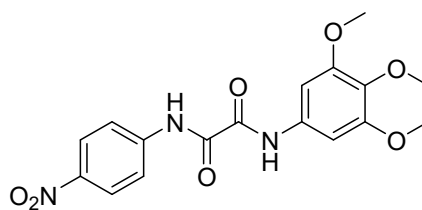

4

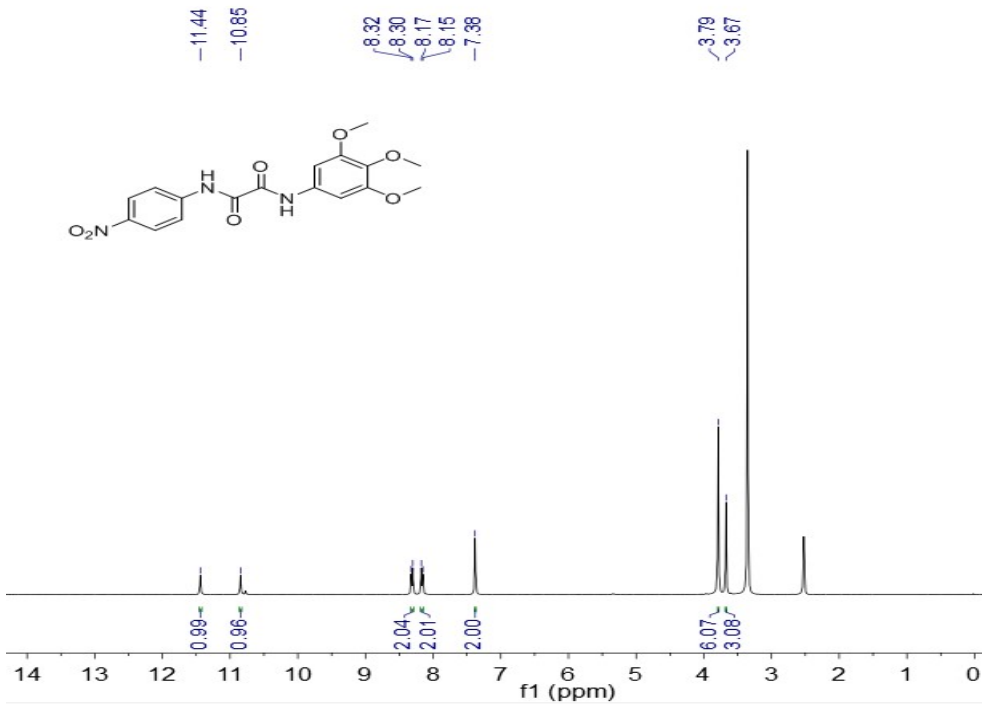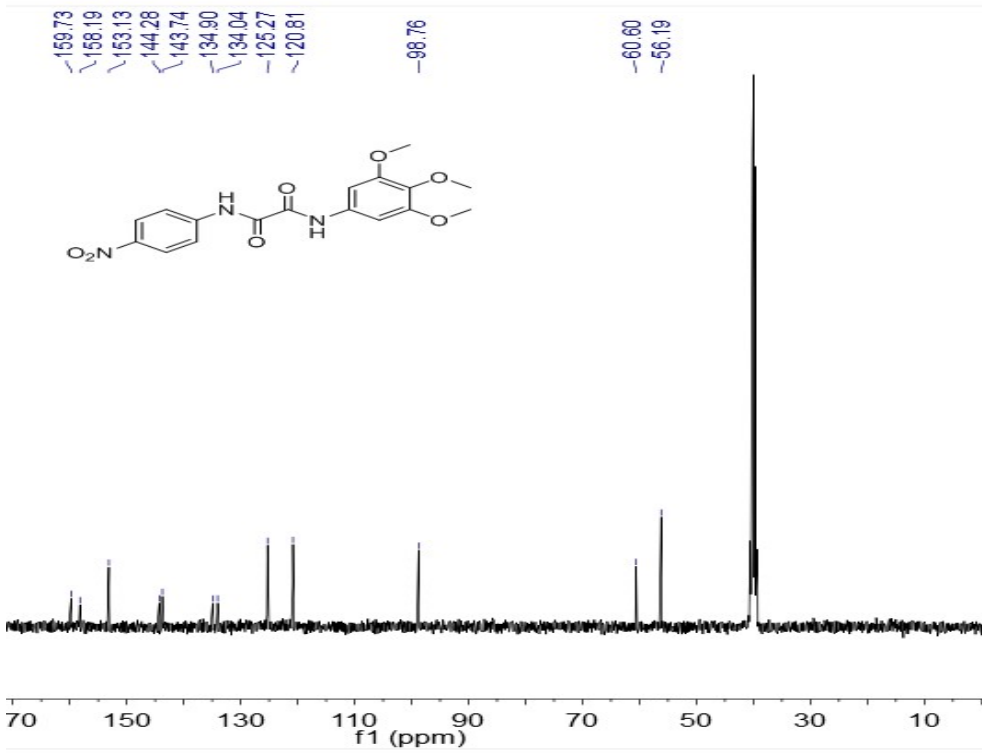



## System Verification of Internal Mass Accuracy ESI Mode

| Analysis Info            |                          |                   |     | Acquisition Date      |                          |
|--------------------------|--------------------------|-------------------|-----|-----------------------|--------------------------|
| Analysis Name            | D:\Data\HYY\CLP_000369.d |                   |     | 5/26/2021 9:30:30 AM  |                          |
| Method                   | 4_19_MassAccuNeg         |                   |     | Operator              | solarIX                  |
| Sample Name              | 58                       |                   |     | Instrument            | solarIX                  |
| Comment                  | Glu-Fib 250amol          |                   |     |                       |                          |
| Acquisition Parameter    |                          |                   |     |                       |                          |
| Polarity                 | Positive                 | n/a               | n/a | No. of Laser Shots    | 200                      |
| n/a                      | n/a                      | No. of Cell Fills | 1   | Laser Power           | 20.0 lp                  |
| Broadband Low Mass       | 53.8 m/z                 | n/a               | n/a | n/a                   | n/a                      |
| Broadband High Mass      | 1000.0 m/z               | n/a               | n/a | n/a                   | n/a                      |
| Acquisition Mode         | Single MS                | n/a               | n/a | Calibration Date      | Fri Feb 21 02:36:54 2014 |
| Pulse Program            | basic                    | n/a               | n/a | Data Acquisition Size | 1048576                  |
| Source Accumulation      | 0.020 sec                | n/a               | n/a | Apodization           | Sine-Bell Multiplication |
| Ion Accumulation Time    | 0.200 sec                | n/a               | n/a |                       |                          |
| Flight Time to Acq. Cell | 0.001 sec                |                   |     |                       |                          |

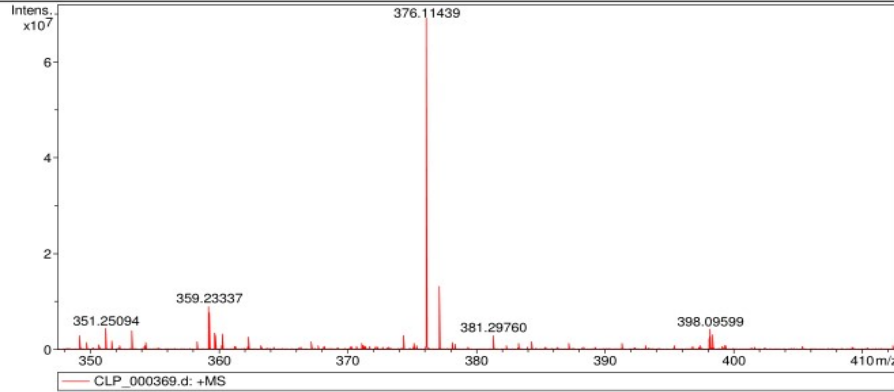

1

2 **Z10**

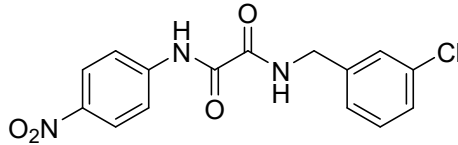

3

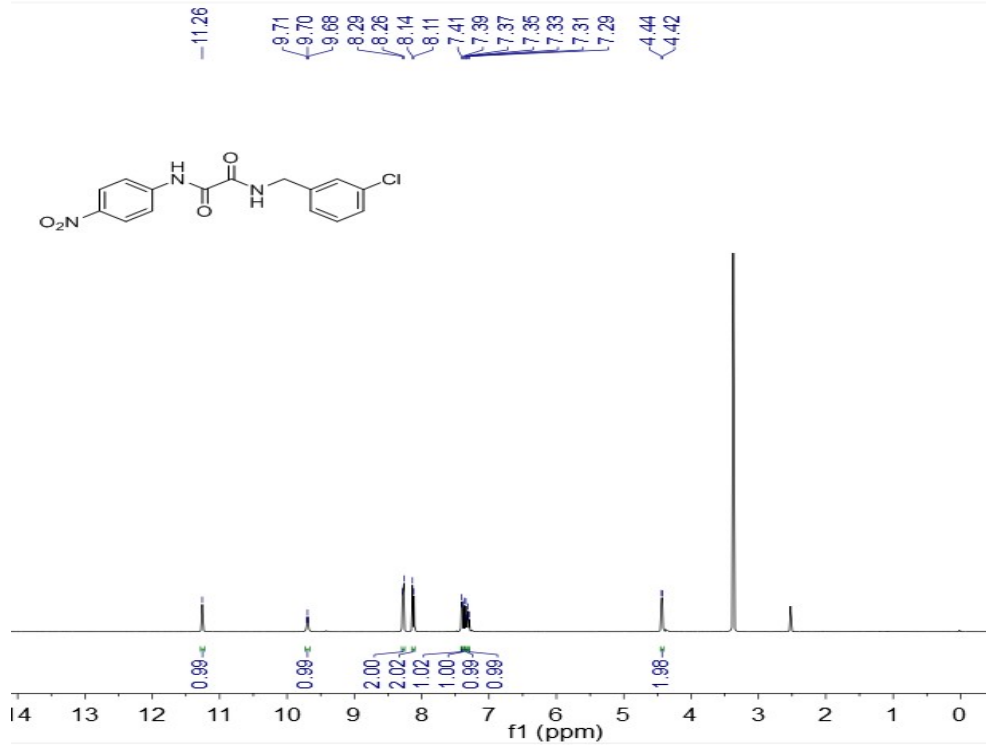

4

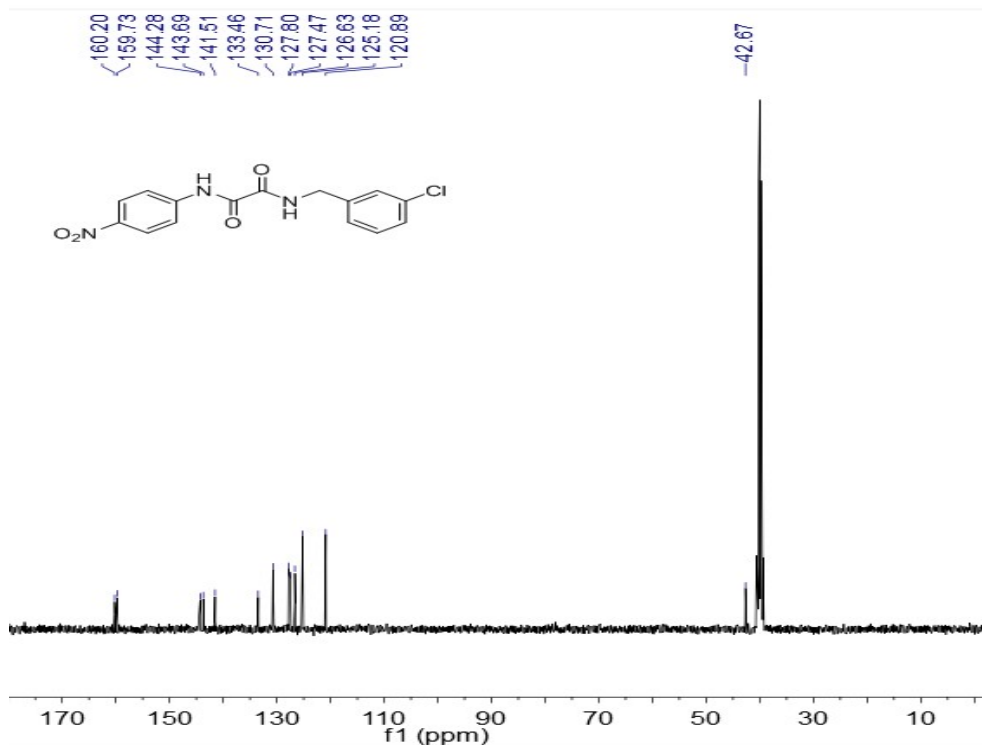

| System Verification of Internal Mass Accuracy ESI Mode |                          |                   |                                      |                       |                          |
|--------------------------------------------------------|--------------------------|-------------------|--------------------------------------|-----------------------|--------------------------|
| <b>Analysis Info</b>                                   |                          |                   | Acquisition Date 6/2/2021 2:14:27 PM |                       |                          |
| Analysis Name                                          | D:\Data\HYY\CLP_000377.d |                   | Operator                             | solarix               |                          |
| Method                                                 | 4_19_MassAccuNeg         |                   | Instrument                           | solarix               |                          |
| Sample Name                                            | 58                       |                   |                                      |                       |                          |
| Comment                                                | Glu-Fib 250amol          |                   |                                      |                       |                          |
| <b>Acquisition Parameter</b>                           |                          |                   |                                      |                       |                          |
| Polarity                                               | Positive                 | n/a               | n/a                                  | No. of Laser Shots    | 200                      |
| n/a                                                    | n/a                      | No. of Cell Fills | 1                                    | Laser Power           | 20.0 lp                  |
| Broadband Low Mass                                     | 53.8 m/z                 | n/a               | n/a                                  | n/a                   | n/a                      |
| Broadband High Mass                                    | 1000.0 m/z               | n/a               | n/a                                  | n/a                   | n/a                      |
| Acquisition Mode                                       | Single MS                | n/a               | n/a                                  |                       |                          |
| Pulse Program                                          | basic                    | n/a               | n/a                                  | Calibration Date      | Fri Feb 21 02:36:54 2014 |
| Source Accumulation                                    | 0.020 sec                | n/a               | n/a                                  | Data Acquisition Size | 1048576                  |
| Ion Accumulation Time                                  | 0.200 sec                | n/a               | n/a                                  | Apodization           | Sine-Bell Multiplication |
| Flight Time to Acq. Cell                               | 0.001 sec                |                   |                                      |                       |                          |

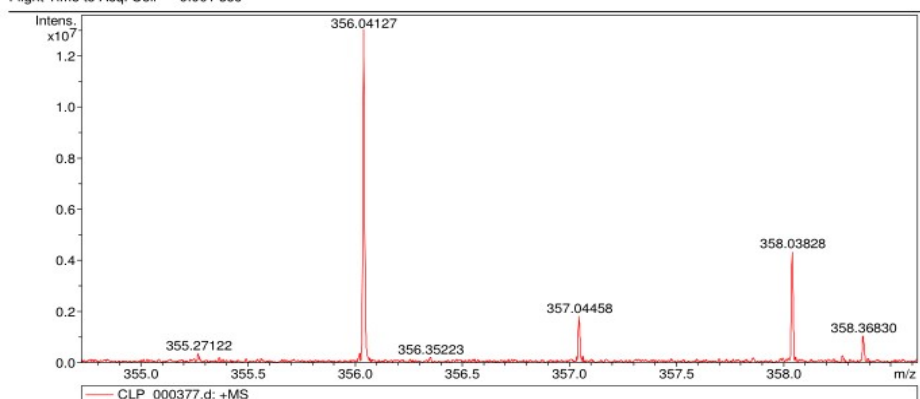

## 4 5. Biological assays

### 5 5.1 Neuraminidase inhibition assay

6 The neuraminidase (H5N1 and H5N1-H274Y) was purchased from Sino Biological

1 Inc. (China). 2-N-mopholino-ethanesulfonic acid (MES) and 4-methylumbelliferyl- $\alpha$ -  
2 D-N-acetylneuraminicacidsodium salt hydrate (4-MUNANA) were purchased from  
3 Sigma. 4-methylumbelliferone (4-MU) was purchased from Shanghai Standard  
4 Technology Co., Ltd. The enzyme assay was performed by using the previously  
5 reported method with slight modifications.<sup>13</sup> The tested compounds were dissolved in  
6 DMSO firstly and then diluted into 6 concentration gradients. For each tested  
7 compound **5** and **Z1-Z10**, a set of solutions with concentrations span the range 0.064  
8  $\mu\text{M}$  to 200  $\mu\text{M}$ . In general, 10  $\mu\text{L}$  of NA, 70  $\mu\text{L}$  buffer solution (33 mM MES, 4 mM  
9  $\text{CaCl}_2$ ), and 10  $\mu\text{L}$  of different concentrations of samples were added to each well of  
10 the 96-well plate. Then the 96-well plate was placed and shocked for 1 minute in the  
11 multifunctional fluorescent enzyme-labeled instrument and the temperature was set at  
12 37°C, so that the NA enzyme and the sample to be tested could be fully mixed. The  
13 mixture was incubated at 37°C for 15 minutes. 10  $\mu\text{L}$  of 100  $\mu\text{M}$  fluorescent substrate  
14 (4-MUNANA) solution was also added to each well. Next, the plate was placed in the  
15 multifunctional fluorescent enzyme-labeled instrument again. It was shaken for 1  
16 minute and then incubated at 37°C for 60 minutes. The reaction was terminated by  
17 adding 150  $\mu\text{L}$  of stop solution (14  $\text{mmol}\cdot\text{L}^{-1}$  NaOH containing 83% ethanol). Finally,  
18 the resulting fluorescence was measured at an excitation wavelength of 355 nm and  
19 an emission wavelength of 460 nm, respectively. Parallel experiments were performed  
20 three times. The oseltamivir acid was used as a positive control in the enzyme  
21 inhibition assay. The inhibition curves were drawn by GraphPad Prism 5.0 software  
22 and the  $\text{IC}_{50}$  values were calculated by using enzyme inhibition rate and concentration  
23 data. The  $\text{IC}_{50}$  ( $\mu\text{M}$ ) is presented as mean  $\pm$  SD from at least three independent tests.

## 24 **5.2 In vitro anti-influenza virus assay and cytotoxicity assay**

25 The *in vitro* anti-influenza virus assay and cytotoxicity assay for compound **Z2**  
26 were performed according to the previously described methodology with slight  
27 modifications.<sup>[14]</sup> The anti-influenza virus activity of compound **Z2** was assessed in  
28 Madin-Darby canine kidney (MDCK) cells by CCK-8 method. The CPE of influenza  
29 virus infection using A/chicken/Hubei/327/2004 (H5N1-DW) as representative of  
30 group-1 NAs-containing influenza strain. The results of  $\text{EC}_{50}$  values were described  
31 the concentrations affording 50% protection against H5N1 virus infection-mediated  
32 CPE. Aliquots of 50  $\mu\text{L}$  of diluted H5N1 were mixed with equal volumes of solutions  
33 of the compound **Z2** in serial 2-fold dilutions in assay media (DMEM). The mixtures  
34 were used to infect 100  $\mu\text{L}$  of CEF at  $1 \times 10^5$  cells/mL in 96-well plates. At 37°C under  
35 5.0%  $\text{CO}_2$  in air, the plates were incubated for 48 h. Then, to each well, 10  $\mu\text{L}$  kit-8

1 (CCK-8) reagent solution and 100  $\mu$ L media was added. After incubation at 37  $^{\circ}$ C for  
2 90 min, the absorbance at 450 nm was read on a microplate reader. Inhibitor  $EC_{50}$   
3 values were determined by fitting the curve of percent CPE versus inhibitor  
4 concentration. OSC was used as a control drugs at the same time. The  $CC_{50}$  value was  
5 used to measure the cytotoxicity of the test compounds to MDCK cells and was  
6 determined in the same manner as  $EC_{50}$  but without virus infection.

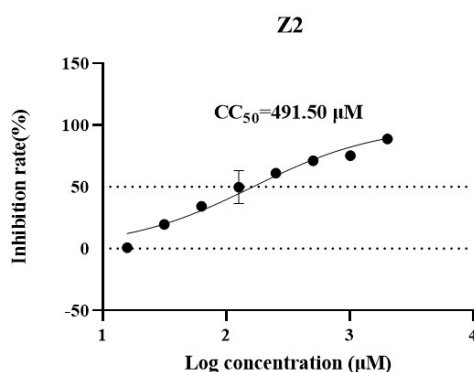

7

8

**Fig. S3** The  $CC_{50}$  profile of the most potent NA inhibitor **Z2**

9

## 10 References

- 11 1. Lengauer T, Rarey M. Computational methods for biomolecular docking, *Curr.*  
12 *Opin. Struc. Biol.* 1996; 6: 402-406.
- 13 2. Gschwend D A, Good A C, Kuntz I D. Molecular docking towards drug discovery,  
14 *J. Mol. Recognit.* 1996; 9: 175-186.
- 15 3. Russell R J, Haire L F, Stevens D J, et al. The structure of H5N1 avian influenza  
16 neuraminidase suggests new opportunities for drug design, *Nature.* 2006; 443: 45-49.
- 17 4. Jain A N. Surflex: fully automatic flexible molecular docking using a molecular  
18 similarity-based search engine, *J. Med. Chem.* 2003; 46: 499-511.
- 19 5. Vay J L, Fawley W. AMBER User's Manual, 2000.
- 20 6. Hornak V, Abel R, Okur A, et al. Comparison of multiple Amber force fields and  
21 development of improved protein backbone parameters, *Proteins.* 2006; 65: 712-725.
- 22 7. Wang J, Wolf R M, Caldwell J W, et al. Development and testing of a general  
23 amber force field, *J. Comput. Chem.* 2004; 25: 1157-1174.
- 24 8. Sun H, Li Y, Shen M, et al. Assessing the performance of MM/PBSA and  
25 MM/GBSA methods. 5. Improved docking performance using high solute dielectric  
26 constant MM/GBSA and MM/PBSA rescoring, *Phys. Chem. Chem. Phys.* 2014; 16:  
27 22035-22045.

- 1 9. Darden T, York D, Pedersen L. Particle mesh Ewald: An  $N \cdot \log(N)$  method for  
2 Ewald sums in large systems, *J. Chem. Phys.* 1993; 98: 10089-10092.
- 3 10. Hou T, Wang J, Li Y, et al. Assessing the performance of the MM/PBSA and  
4 MM/GBSA methods. 1. The accuracy of binding free energy calculations based on  
5 molecular dynamics simulations, *J. Chem. Inf. Model.* 2011; 51: 69-82.
- 6 11. Liu M, Yuan M, Luo M, et al. Binding of curcumin with glyoxalase I: Molecular  
7 docking, molecular dynamics simulations, and kinetics analysis, *Biophys. Chem.* 2010;  
8 147: 28-34.
- 9 12. Massova I, Kollman P A. Combined molecular mechanical and continuum solvent  
10 approach (MM-PBSA/GBSA) to predict ligand binding, *Perspect. Drug. Discov.*  
11 2000; 18: 113-135.
- 12 13. Wang K, Yang F, Wang L, et al. Synthesis and biological evaluation of NH<sub>2</sub>-acyl  
13 oseltamivir analogues as potent neuraminidase inhibitors, *Eur. J. Med. Chem.* 2017;  
14 141: 648-656.
- 15 14. Zhang J, Murugan N A, Tian Y, et al. Structure-based optimization of N-  
16 substituted oseltamivir derivatives as potent anti-Influenza A virus agents with  
17 significantly improved potency against oseltamivir-resistant N1-H274Y variant, *J.*  
18 *Med. Chem.* 2018; 61: 9976-9999.
